# Supplementary material
Source: Research Square preprint supplement (doi:10.21203/rs.3.rs-10254072/v1)
Supplement: Supplementary file 1 [file b9618bd380d2b9306600739e.xlsx]

## Sheet: Stacking_Res_Seedling_Race1_TS
DH105x56	QTs.cur–1B_105	QTs.cur–1B_105	Ptr_race 1
H001	B	Allele_56	1.83
H003	B	Allele_56	1.33
H004	B	Allele_56	1.5
H006	B	Allele_56	1.67
H009	A	Allele_105	1.5
H010	B	Allele_56	1.17
H011	B	Allele_56	2.33
H012	B	Allele_56	1.83
H013	B	Allele_56	1.83
H014	A	Allele_105	1.17
H017	A	Allele_105	1.33
H018	A	Allele_105	1.33
H019	A	Allele_105	1.83
H033	A	Allele_105	1.25
H036	B	Allele_56	1.5
H040	A	Allele_105	1.33
H043	A	Allele_105	1.67
H047	A	Allele_105	1
H052	A	Allele_105	1.83
H054	B	Allele_56	1.33
H056	B	Allele_56	1.83
H058	B	Allele_56	2
H061	A	Allele_105	1.33
H063	A	Allele_105	1.33
H064	A	Allele_105	1
H065	B	Allele_56	1.5
H067	B	Allele_56	-
H072	A	Allele_105	1
H073	B	Allele_56	1.67
H075	A	Allele_105	1
H078	B	Allele_56	1.67
H081	B	Allele_56	1.67
H082	A	Allele_105	1.33
H087	A	Allele_105	1.33
H088	A	Allele_105	1.33
H089	B	Allele_56	1.83
H091	B	Allele_56	2.33
H093	B	Allele_56	1.67
H095	B	Allele_56	1.67
H096	A	Allele_105	1.33
H098	A	Allele_105	1.5
H102	A	Allele_105	1.33
H112	B	Allele_56	2
H115	B	Allele_56	1.5
H116	B	Allele_56	1.67
H118	A	Allele_105	1.67
H120	B	Allele_56	2.5
H122	B	Allele_56	3.33
H123	B	Allele_56	1.33
H124	B	Allele_56	1.33
H126	B	Allele_56	1.5
H128	B	Allele_56	1.67
H130	A	Allele_105	1.5
H131	B	Allele_56	1.5
H132	B	Allele_56	2
H133	A	Allele_105	1.17
H134	B	Allele_56	1.83
H135	B	Allele_56	1.5
H136	B	Allele_56	1.33
H143	A	Allele_105	1.83
H145	B	Allele_56	1.67
H146	A	Allele_105	1.33
H147	B	Allele_56	1.5
H148	B	Allele_56	1.5
H151	A	Allele_105	-
H152	A	Allele_105	1.17
H153	A	Allele_105	-
H156	B	Allele_56	1.75
H161	A	Allele_105	1.5
H163	B	Allele_56	1.5
H167	A	Allele_105	1
H176	B	Allele_56	1.67
H177	A	Allele_105	1.5
H178	B	Allele_56	1.5
H179	A	Allele_105	2
H181	A	Allele_105	1.67
H184	A	Allele_105	1.33
H187	B	Allele_56	2.5
H190	B	Allele_56	1.83
H191	A	Allele_105	1
H192	A	Allele_105	1.33
H193	A	Allele_105	1.75
H195	A	Allele_105	1
H196	A	Allele_105	-
H207	A	Allele_105	1.33
H208	B	Allele_56	1.5
H210	B	Allele_56	1.67
H211	A	Allele_105	1.5
H214	A	Allele_105	1.67
H216	A	Allele_105	2.17
H217	A	Allele_105	1.17
H223	A	Allele_105	1.67
H225	B	Allele_56	1.5
H226	A	Allele_105	1
H227	B	Allele_56	2.33
H228	A	Allele_105	1.5
H230	B	Allele_56	2
H231	B	Allele_56	1.67
H232	B	Allele_56	1.33
H234	A	Allele_105	-
H235	B	Allele_56	2.33
H236	A	Allele_105	1.5
H237	B	Allele_56	2
H238	B	Allele_56	2.17
H242	B	Allele_56	1.5
H244	B	Allele_56	2.17
H247	A	Allele_105	1.17
H248	A	Allele_105	1.67
H251	B	Allele_56	1.83
H252	A	Allele_105	1.83
H255	B	Allele_56	1.33
H256	B	Allele_56	1.33
H258	A	Allele_105	1.17
H259	B	Allele_56	1.83
H263	A	Allele_105	2.17
H264	B	Allele_56	1.83
H265	A	Allele_105	1
H266	B	Allele_56	1.5
H267	B	Allele_56	1.83
H272	B	Allele_56	2.33
H274	A	Allele_105	1.33
H275	B	Allele_56	1.67
H285	A	Allele_105	1.67
H286	A	Allele_105	1.17
H287	A	Allele_105	1
H289	A	Allele_105	1.33
H291	A	Allele_105	1.17
H295	A	Allele_105	1.83
H296	A	Allele_105	1.67
H298	B	Allele_56	1.83
H300	A	Allele_105	1.67
H304	B	Allele_56	2.83
H305	B	Allele_56	3.17
H306	B	Allele_56	1.33
H307	B	Allele_56	2.17
H308	A	Allele_105	1.67
H309	A	Allele_105	-
H312	B	Allele_56	1.67
H314	B	Allele_56	1.83
H316	B	Allele_56	1.5
H318	B	Allele_56	1.5
H321	A	Allele_105	1
H323	A	Allele_105	1.5
H324	A	Allele_105	1.33
H327	A	Allele_105	1
H328	B	Allele_56	1.33
H331	B	Allele_56	1.67
H333	B	Allele_56	1.83
H336	B	Allele_56	1.83
H339	A	Allele_105	1.5
H341	B	Allele_56	2
H342	A	Allele_105	1.33
H343	B	Allele_56	1.5
H344	A	Allele_105	1.67
H345	B	Allele_56	1.83
H346	B	Allele_56	1.33
H348	B	Allele_56	2.17
H349	A	Allele_105	1.5
H352	B	Allele_56	1.67
H353	B	Allele_56	1.67
H359	B	Allele_56	2.5
H361	B	Allele_56	2.83
H362	A	Allele_105	2
H363	B	Allele_56	1.5
H364	B	Allele_56	1.67
H366	A	Allele_105	1.33
H369	B	Allele_56	2.17
H370	B	Allele_56	2.5
H374	B	Allele_56	2
H379	B	Allele_56	1.83
H384	B	Allele_56	2
H385	A	Allele_105	2
H386	B	Allele_56	2.17
H388	B	Allele_56	2
H392	A	Allele_105	-
H398	B	Allele_56	-
H401	B	Allele_56	1.83
H402	B	Allele_56	1.75
H405	B	Allele_56	1.67
H406	B	Allele_56	2
H408	A	Allele_105	1.67
H410	B	Allele_56	1.33
H411	B	Allele_56	1.67
H412	A	Allele_105	1.17
H414	A	Allele_105	1.67
H416	A	Allele_105	1.17
H418	A	Allele_105	1.17
H419	A	Allele_105	1.5
H420	A	Allele_105	1.17
H421	B	Allele_56	1.5
H422	A	Allele_105	1
H423	A	Allele_105	1.33
H424	A	Allele_105	1.5
H428	A	Allele_105	1.17
H429	A	Allele_105	1.33
H430	B	Allele_56	1.67
H433	B	Allele_56	2
H434	A	Allele_105	1.17
H435	B	Allele_56	2
H438	B	Allele_56	1.67
H440	A	Allele_105	1.5
H441	A	Allele_105	1.33
H446	B	Allele_56	2.33
H447	B	Allele_56	1.67
H449	B	Allele_56	1.5
H450	B	Allele_56	2
H451	B	Allele_56	1.17
H452	A	Allele_105	1.5
H455	A	Allele_105	1.17
H462	B	Allele_56	1.17
H463	B	Allele_56	1.67
H464	B	Allele_56	2.17
H466	A	Allele_105	1.33
H467	B	Allele_56	1.5
H475	A	Allele_105	1.5
H477	B	Allele_56	1.83
H478	B	Allele_56	1.5
H482	B	Allele_56	2
H484	A	Allele_105	1.33
H485	A	Allele_105	1.17
H486	A	Allele_105	1.5
H489	A	Allele_105	1
H491	A	Allele_105	1.33
H492	B	Allele_56	1.67
H493	A	Allele_105	1.5
H494	A	Allele_105	1.5
H498	A	Allele_105	1
H504	B	Allele_56	2
H506	B	Allele_56	2.17
H507	B	Allele_56	3
H509	A	Allele_105	1.5
H511	B	Allele_56	2.25
H514	A	Allele_105	1
H516	A	Allele_105	1.17
H517	B	Allele_56	1.5
H520	A	Allele_105	1.33
H521	B	Allele_56	1.67
H526	A	Allele_105	1.33
H527	A	Allele_105	1.33
H529	A	Allele_105	2.17
H530	B	Allele_56	1.75
			YS_isolate1
			1.83
			1.33
			1.5
			1.67
			1.5
			1.17
			2.33
			1.83
			1.83
			1.17
			1.33
			1.33
			1.83
			1.25
			1.5
			1.33
			1.67
			1
			1.83
			1.33
			1.83
			2
			1.33
			1.33
			1
			1.5
			-
			1
			1.67
			1
			1.67
			1.67
			1.33
			1.33
			1.33
			1.83
			2.33
			1.67
			1.67
			1.33
			1.5
			1.33
			2
			1.5
			1.67
			1.67
			2.5
			3.33
			1.33
			1.33
			1.5
			1.67
			1.5
			1.5
			2
			1.17
			1.83
			1.5
			1.33
			1.83
			1.67
			1.33
			1.5
			1.5
			-
			1.17
			-
			1.75
			1.5
			1.5
			1
			1.67
			1.5
			1.5
			2
			1.67
			1.33
			2.5
			1.83
			1
			1.33
			1.75
			1
			-
			1.33
			1.5
			1.67
			1.5
			1.67
			2.17
			1.17
			1.67
			1.5
			1
			2.33
			1.5
			2
			1.67
			1.33
			-
			2.33
			1.5
			2
			2.17
			1.5
			2.17
			1.17
			1.67
			1.83
			1.83
			1.33
			1.33
			1.17
			1.83
			2.17
			1.83
			1
			1.5
			1.83
			2.33
			1.33
			1.67
			1.67
			1.17
			1
			1.33
			1.17
			1.83
			1.67
			1.83
			1.67
			2.83
			3.17
			1.33
			2.17
			1.67
			-
			1.67
			1.83
			1.5
			1.5
			1
			1.5
			1.33
			1
			1.33
			1.67
			1.83
			1.83
			1.5
			2
			1.33
			1.5
			1.67
			1.83
			1.33
			2.17
			1.5
			1.67
			1.67
			2.5
			2.83
			2
			1.5
			1.67
			1.33
			2.17
			2.5
			2
			1.83
			2
			2
			2.17
			2
			-
			-
			1.83
			1.75
			1.67
			2
			1.67
			1.33
			1.67
			1.17
			1.67
			1.17
			1.17
			1.5
			1.17
			1.5
			1
			1.33
			1.5
			1.17
			1.33
			1.67
			2
			1.17
			2
			1.67
			1.5
			1.33
			2.33
			1.67
			1.5
			2
			1.17
			1.5
			1.17
			1.17
			1.67
			2.17
			1.33
			1.5
			1.5
			1.83
			1.5
			2
			1.33
			1.17
			1.5
			1
			1.33
			1.67
			1.5
			1.5
			1
			2
			2.17
			3
			1.5
			2.25
			1
			1.17
			1.5
			1.33
			1.67
			1.33
			1.33
			2.17
			1.75
			YS_isolate1
			1.83
			1.33
			1.5
			1.67
			1.5
			1.17
			2.33
			1.83
			1.83
			1.17
			1.33
			1.33
			1.83
			1.25
			1.5
			1.33
			1.67
			1
			1.83
			1.33
			1.83
			2
			1.33
			1.33
			1
			1.5
			-
			1
			1.67
			1
			1.67
			1.67
			1.33
			1.33
			1.33
			1.83
			2.33
			1.67
			1.67
			1.33
			1.5
			1.33
			2
			1.5
			1.67
			1.67
			2.5
			3.33
			1.33
			1.33
			1.5
			1.67
			1.5
			1.5
			2
			1.17
			1.83
			1.5
			1.33
			1.83
			1.67
			1.33
			1.5
			1.5
			-
			1.17
			-
			1.75
			1.5
			1.5
			1
			1.67
			1.5
			1.5
			2
			1.67
			1.33
			2.5
			1.83
			1
			1.33
			1.75
			1
			-
			1.33
			1.5
			1.67
			1.5
			1.67
			2.17
			1.17
			1.67
			1.5
			1
			2.33
			1.5
			2
			1.67
			1.33
			-
			2.33
			1.5
			2
			2.17
			1.5
			2.17
			1.17
			1.67
			1.83
			1.83
			1.33
			1.33
			1.17
			1.83
			2.17
			1.83
			1
			1.5
			1.83
			2.33
			1.33
			1.67
			1.67
			1.17
			1
			1.33
			1.17
			1.83
			1.67
			1.83
			1.67
			2.83
			3.17
			1.33
			2.17
			1.67
			-
			1.67
			1.83
			1.5
			1.5
			1
			1.5
			1.33
			1
			1.33
			1.67
			1.83
			1.83
			1.5
			2
			1.33
			1.5
			1.67
			1.83
			1.33
			2.17
			1.5
			1.67
			1.67
			2.5
			2.83
			2
			1.5
			1.67
			1.33
			2.17
			2.5
			2
			1.83
			2
			2
			2.17
			2
			-
			-
			1.83
			1.75
			1.67
			2
			1.67
			1.33
			1.67
			1.17
			1.67
			1.17
			1.17
			1.5
			1.17
			1.5
			1
			1.33
			1.5
			1.17
			1.33
			1.67
			2
			1.17
			2
			1.67
			1.5
			1.33
			2.33
			1.67
			1.5
			2
			1.17
			1.5
			1.17
			1.17
			1.67
			2.17
			1.33
			1.5
			1.5
			1.83
			1.5
			2
			1.33
			1.17
			1.5
			1
			1.33
			1.67
			1.5
			1.5
			1
			2
			2.17
			3
			1.5
			2.25
			1
			1.17
			1.5
			1.33
			1.67
			1.33
			1.33
			2.17
			1.75
			YS_isolate1
			1.83
			1.33
			1.5
			1.67
			1.5
			1.17
			2.33
			1.83
			1.83
			1.17
			1.33
			1.33
			1.83
			1.25
			1.5
			1.33
			1.67
			1
			1.83
			1.33
			1.83
			2
			1.33
			1.33
			1
			1.5
			-
			1
			1.67
			1
			1.67
			1.67
			1.33
			1.33
			1.33
			1.83
			2.33
			1.67
			1.67
			1.33
			1.5
			1.33
			2
			1.5
			1.67
			1.67
			2.5
			3.33
			1.33
			1.33
			1.5
			1.67
			1.5
			1.5
			2
			1.17
			1.83
			1.5
			1.33
			1.83
			1.67
			1.33
			1.5
			1.5
			-
			1.17
			-
			1.75
			1.5
			1.5
			1
			1.67
			1.5
			1.5
			2
			1.67
			1.33
			2.5
			1.83
			1
			1.33
			1.75
			1
			-
			1.33
			1.5
			1.67
			1.5
			1.67
			2.17
			1.17
			1.67
			1.5
			1
			2.33
			1.5
			2
			1.67
			1.33
			-
			2.33
			1.5
			2
			2.17
			1.5
			2.17
			1.17
			1.67
			1.83
			1.83
			1.33
			1.33
			1.17
			1.83
			2.17
			1.83
			1
			1.5
			1.83
			2.33
			1.33
			1.67
			1.67
			1.17
			1
			1.33
			1.17
			1.83
			1.67
			1.83
			1.67
			2.83
			3.17
			1.33
			2.17
			1.67
			-
			1.67
			1.83
			1.5
			1.5
			1
			1.5
			1.33
			1
			1.33
			1.67
			1.83
			1.83
			1.5
			2
			1.33
			1.5
			1.67
			1.83
			1.33
			2.17
			1.5
			1.67
			1.67
			2.5
			2.83
			2
			1.5
			1.67
			1.33
			2.17
			2.5
			2
			1.83
			2
			2
			2.17
			2
			-
			-
			1.83
			1.75
			1.67
			2
			1.67
			1.33
			1.67
			1.17
			1.67
			1.17
			1.17
			1.5
			1.17
			1.5
			1
			1.33
			1.5
			1.17
			1.33
			1.67
			2
			1.17
			2
			1.67
			1.5
			1.33
			2.33
			1.67
			1.5
			2
			1.17
			1.5
			1.17
			1.17
			1.67
			2.17
			1.33
			1.5
			1.5
			1.83
			1.5
			2
			1.33
			1.17
			1.5
			1
			1.33
			1.67
			1.5
			1.5
			1
			2
			2.17
			3
			1.5
			2.25
			1
			1.17
			1.5
			1.33
			1.67
			1.33
			1.33
			2.17
			1.75
			YS_isolate1
			1.83
			1.33
			1.5
			1.67
			1.5
			1.17
			2.33
			1.83
			1.83
			1.17
			1.33
			1.33
			1.83
			1.25
			1.5
			1.33
			1.67
			1
			1.83
			1.33
			1.83
			2
			1.33
			1.33
			1
			1.5
			-
			1
			1.67
			1
			1.67
			1.67
			1.33
			1.33
			1.33
			1.83
			2.33
			1.67
			1.67
			1.33
			1.5
			1.33
			2
			1.5
			1.67
			1.67
			2.5
			3.33
			1.33
			1.33
			1.5
			1.67
			1.5
			1.5
			2
			1.17
			1.83
			1.5
			1.33
			1.83
			1.67
			1.33
			1.5
			1.5
			-
			1.17
			-
			1.75
			1.5
			1.5
			1
			1.67
			1.5
			1.5
			2
			1.67
			1.33
			2.5
			1.83
			1
			1.33
			1.75
			1
			-
			1.33
			1.5
			1.67
			1.5
			1.67
			2.17
			1.17
			1.67
			1.5
			1
			2.33
			1.5
			2
			1.67
			1.33
			-
			2.33
			1.5
			2
			2.17
			1.5
			2.17
			1.17
			1.67
			1.83
			1.83
			1.33
			1.33
			1.17
			1.83
			2.17
			1.83
			1
			1.5
			1.83
			2.33
			1.33
			1.67
			1.67
			1.17
			1
			1.33
			1.17
			1.83
			1.67
			1.83
			1.67
			2.83
			3.17
			1.33
			2.17
			1.67
			-
			1.67
			1.83
			1.5
			1.5
			1
			1.5
			1.33
			1
			1.33
			1.67
			1.83
			1.83
			1.5
			2
			1.33
			1.5
			1.67
			1.83
			1.33
			2.17
			1.5
			1.67
			1.67
			2.5
			2.83
			2
			1.5
			1.67
			1.33
			2.17
			2.5
			2
			1.83
			2
			2
			2.17
			2
			-
			-
			1.83
			1.75
			1.67
			2
			1.67
			1.33
			1.67
			1.17
			1.67
			1.17
			1.17
			1.5
			1.17
			1.5
			1
			1.33
			1.5
			1.17
			1.33
			1.67
			2
			1.17
			2
			1.67
			1.5
			1.33
			2.33
			1.67
			1.5
			2
			1.17
			1.5
			1.17
			1.17
			1.67
			2.17
			1.33
			1.5
			1.5
			1.83
			1.5
			2
			1.33
			1.17
			1.5
			1
			1.33
			1.67
			1.5
			1.5
			1
			2
			2.17
			3
			1.5
			2.25
			1
			1.17
			1.5
			1.33
			1.67
			1.33
			1.33
			2.17
			1.75
			YS_isolate1
			1.83
			1.33
			1.5
			1.67
			1.5
			1.17
			2.33
			1.83
			1.83
			1.17
			1.33
			1.33
			1.83
			1.25
			1.5
			1.33
			1.67
			1
			1.83
			1.33
			1.83
			2
			1.33
			1.33
			1
			1.5
			-
			1
			1.67
			1
			1.67
			1.67
			1.33
			1.33
			1.33
			1.83
			2.33
			1.67
			1.67
			1.33
			1.5
			1.33
			2
			1.5
			1.67
			1.67
			2.5
			3.33
			1.33
			1.33
			1.5
			1.67
			1.5
			1.5
			2
			1.17
			1.83
			1.5
			1.33
			1.83
			1.67
			1.33
			1.5
			1.5
			-
			1.17
			-
			1.75
			1.5
			1.5
			1
			1.67
			1.5
			1.5
			2
			1.67
			1.33
			2.5
			1.83
			1
			1.33
			1.75
			1
			-
			1.33
			1.5
			1.67
			1.5
			1.67
			2.17
			1.17
			1.67
			1.5
			1
			2.33
			1.5
			2
			1.67
			1.33
			-
			2.33
			1.5
			2
			2.17
			1.5
			2.17
			1.17
			1.67
			1.83
			1.83
			1.33
			1.33
			1.17
			1.83
			2.17
			1.83
			1
			1.5
			1.83
			2.33
			1.33
			1.67
			1.67
			1.17
			1
			1.33
			1.17
			1.83
			1.67
			1.83
			1.67
			2.83
			3.17
			1.33
			2.17
			1.67
			-
			1.67
			1.83
			1.5
			1.5
			1
			1.5
			1.33
			1
			1.33
			1.67
			1.83
			1.83
			1.5
			2
			1.33
			1.5
			1.67
			1.83
			1.33
			2.17
			1.5
			1.67
			1.67
			2.5
			2.83
			2
			1.5
			1.67
			1.33
			2.17
			2.5
			2
			1.83
			2
			2
			2.17
			2
			-
			-
			1.83
			1.75
			1.67
			2
			1.67
			1.33
			1.67
			1.17
			1.67
			1.17
			1.17
			1.5
			1.17
			1.5
			1
			1.33
			1.5
			1.17
			1.33
			1.67
			2
			1.17
			2
			1.67
			1.5
			1.33
			2.33
			1.67
			1.5
			2
			1.17
			1.5
			1.17
			1.17
			1.67
			2.17
			1.33
			1.5
			1.5
			1.83
			1.5
			2
			1.33
			1.17
			1.5
			1
			1.33
			1.67
			1.5
			1.5
			1
			2
			2.17
			3
			1.5
			2.25
			1
			1.17
			1.5
			1.33
			1.67
			1.33
			1.33
			2.17
			1.75
			YS_isolate1
			1.83
			1.33
			1.5
			1.67
			1.5
			1.17
			2.33
			1.83
			1.83
			1.17
			1.33
			1.33
			1.83
			1.25
			1.5
			1.33
			1.67
			1
			1.83
			1.33
			1.83
			2
			1.33
			1.33
			1
			1.5
			-
			1
			1.67
			1
			1.67
			1.67
			1.33
			1.33
			1.33
			1.83
			2.33
			1.67
			1.67
			1.33
			1.5
			1.33
			2
			1.5
			1.67
			1.67
			2.5
			3.33
			1.33
			1.33
			1.5
			1.67
			1.5
			1.5
			2
			1.17
			1.83
			1.5
			1.33
			1.83
			1.67
			1.33
			1.5
			1.5
			-
			1.17
			-
			1.75
			1.5
			1.5
			1
			1.67
			1.5
			1.5
			2
			1.67
			1.33
			2.5
			1.83
			1
			1.33
			1.75
			1
			-
			1.33
			1.5
			1.67
			1.5
			1.67
			2.17
			1.17
			1.67
			1.5
			1
			2.33
			1.5
			2
			1.67
			1.33
			-
			2.33
			1.5
			2
			2.17
			1.5
			2.17
			1.17
			1.67
			1.83
			1.83
			1.33
			1.33
			1.17
			1.83
			2.17
			1.83
			1
			1.5
			1.83
			2.33
			1.33
			1.67
			1.67
			1.17
			1
			1.33
			1.17
			1.83
			1.67
			1.83
			1.67
			2.83
			3.17
			1.33
			2.17
			1.67
			-
			1.67
			1.83
			1.5
			1.5
			1
			1.5
			1.33
			1
			1.33
			1.67
			1.83
			1.83
			1.5
			2
			1.33
			1.5
			1.67
			1.83
			1.33
			2.17
			1.5
			1.67
			1.67
			2.5
			2.83
			2
			1.5
			1.67
			1.33
			2.17
			2.5
			2
			1.83
			2
			2
			2.17
			2
			-
			-
			1.83
			1.75
			1.67
			2
			1.67
			1.33
			1.67
			1.17
			1.67
			1.17
			1.17
			1.5
			1.17
			1.5
			1
			1.33
			1.5
			1.17
			1.33
			1.67
			2
			1.17
			2
			1.67
			1.5
			1.33
			2.33
			1.67
			1.5
			2
			1.17
			1.5
			1.17
			1.17
			1.67
			2.17
			1.33
			1.5
			1.5
			1.83
			1.5
			2
			1.33
			1.17
			1.5
			1
			1.33
			1.67
			1.5
			1.5
			1
			2
			2.17
			3
			1.5
			2.25
			1
			1.17
			1.5
			1.33
			1.67
			1.33
			1.33
			2.17
			1.75
			YS_isolate1
			1.83
			1.33
			1.5
			1.67
			1.5
			1.17
			2.33
			1.83
			1.83
			1.17
			1.33
			1.33
			1.83
			1.25
			1.5
			1.33
			1.67
			1
			1.83
			1.33
			1.83
			2
			1.33
			1.33
			1
			1.5
			-
			1
			1.67
			1
			1.67
			1.67
			1.33
			1.33
			1.33
			1.83
			2.33
			1.67
			1.67
			1.33
			1.5
			1.33
			2
			1.5
			1.67
			1.67
			2.5
			3.33
			1.33
			1.33
			1.5
			1.67
			1.5
			1.5
			2
			1.17
			1.83
			1.5
			1.33
			1.83
			1.67
			1.33
			1.5
			1.5
			-
			1.17
			-
			1.75
			1.5
			1.5
			1
			1.67
			1.5
			1.5
			2
			1.67
			1.33
			2.5
			1.83
			1
			1.33
			1.75
			1
			-
			1.33
			1.5
			1.67
			1.5
			1.67
			2.17
			1.17
			1.67
			1.5
			1
			2.33
			1.5
			2
			1.67
			1.33
			-
			2.33
			1.5
			2
			2.17
			1.5
			2.17
			1.17
			1.67
			1.83
			1.83
			1.33
			1.33
			1.17
			1.83
			2.17
			1.83
			1
			1.5
			1.83
			2.33
			1.33
			1.67
			1.67
			1.17
			1
			1.33
			1.17
			1.83
			1.67
			1.83
			1.67
			2.83
			3.17
			1.33
			2.17
			1.67
			-
			1.67
			1.83
			1.5
			1.5
			1
			1.5
			1.33
			1
			1.33
			1.67
			1.83
			1.83
			1.5
			2
			1.33
			1.5
			1.67
			1.83
			1.33
			2.17
			1.5
			1.67
			1.67
			2.5
			2.83
			2
			1.5
			1.67
			1.33
			2.17
			2.5
			2
			1.83
			2
			2
			2.17
			2
			-
			-
			1.83
			1.75
			1.67
			2
			1.67
			1.33
			1.67
			1.17
			1.67
			1.17
			1.17
			1.5
			1.17
			1.5
			1
			1.33
			1.5
			1.17
			1.33
			1.67
			2
			1.17
			2
			1.67
			1.5
			1.33
			2.33
			1.67
			1.5
			2
			1.17
			1.5
			1.17
			1.17
			1.67
			2.17
			1.33
			1.5
			1.5
			1.83
			1.5
			2
			1.33
			1.17
			1.5
			1
			1.33
			1.67
			1.5
			1.5
			1
			2
			2.17
			3
			1.5
			2.25
			1
			1.17
			1.5
			1.33
			1.67
			1.33
			1.33
			2.17
			1.75
			YS_isolate1
			1.83
			1.33
			1.5
			1.67
			1.5
			1.17
			2.33
			1.83
			1.83
			1.17
			1.33
			1.33
			1.83
			1.25
			1.5
			1.33
			1.67
			1
			1.83
			1.33
			1.83
			2
			1.33
			1.33
			1
			1.5
			-
			1
			1.67
			1
			1.67
			1.67
			1.33
			1.33
			1.33
			1.83
			2.33
			1.67
			1.67
			1.33
			1.5
			1.33
			2
			1.5
			1.67
			1.67
			2.5
			3.33
			1.33
			1.33
			1.5
			1.67
			1.5
			1.5
			2
			1.17
			1.83
			1.5
			1.33
			1.83
			1.67
			1.33
			1.5
[truncated: 13,488 more rows]

## Sheet: Stacking_Res_Seedling_Race2_TS
DH105x56	QTs.cur–1B_105	QSnb.Ts.cur–2D1_56	Genotype	Num.Res.105:ZIF14	Num.Res.56:ZWB11	Total.Res.Loci	Group	Ptr_race 2
H001	B	A	BA	0	0	0	Res_0	1.83333
H003	B	B	BB	0	1	1	Res_1	1.33333
H004	B	A	BA	0	0	0	Res_0	2.33333
H006	B	B	BB	0	1	1	Res_1	2.16667
H009	A	B	AB	1	1	2	Res_2	1.75
H010	B	A	BA	0	0	0	Res_0	3.33333
H011	B	A	BA	0	0	0	Res_0	2.5
H012	B	B	BB	0	1	1	Res_1	2.16667
H013	B	A	BA	0	0	0	Res_0	2
H014	A	B	AB	1	1	2	Res_2	1.33333
H017	A	B	AB	1	1	2	Res_2	1.5
H018	A	A	AA	1	0	1	Res_1	2
H019	A	B	AB	1	1	2	Res_2	2.16667
H033	A	A	AA	1	0	1	Res_1	1.5
H036	B	A	BA	0	0	0	Res_0	1.75
H040	A	B	AB	1	1	2	Res_2	1
H043	A	B	AB	1	1	2	Res_2	1.75
H047	A	A	AA	1	0	1	Res_1	1.16667
H052	A	A	AA	1	0	1	Res_1	1.66667
H054	B	B	BB	0	1	1	Res_1	2.16667
H056	B	B	BB	0	1	1	Res_1	1.83333
H058	B	B	BB	0	1	1	Res_1	1.33333
H061	A	A	AA	1	0	1	Res_1	1.83333
H063	A	A	AA	1	0	1	Res_1	1.33333
H064	A	B	AB	1	1	2	Res_2	1.66667
H065	B	A	BA	0	0	0	Res_0	1.33333
H067	B	A	BA	0	0	0	Res_0	3.16667
H072	A	A	AA	1	0	1	Res_1	1.5
H073	B	B	BB	0	1	1	Res_1	2.66667
H075	A	B	AB	1	1	2	Res_2	1.16667
H078	B	A	BA	0	0	0	Res_0	2
H081	B	A	BA	0	0	0	Res_0	2
H082	A	B	AB	1	1	2	Res_2	1.16667
H087	A	A	AA	1	0	1	Res_1	1.16667
H088	A	B	AB	1	1	2	Res_2	1
H089	B	A	BA	0	0	0	Res_0	2.5
H091	B	A	BA	0	0	0	Res_0	2.66667
H093	B	A	BA	0	0	0	Res_0	1.33333
H095	B	A	BA	0	0	0	Res_0	2.33333
H096	A	B	AB	1	1	2	Res_2	1.33333
H098	A	B	AB	1	1	2	Res_2	1
H102	A	A	AA	1	0	1	Res_1	1.33333
H112	B	B	BB	0	1	1	Res_1	1.66667
H115	B	A	BA	0	0	0	Res_0	2.33333
H116	B	B	BB	0	1	1	Res_1	2
H118	A	B	AB	1	1	2	Res_2	1.66667
H120	B	A	BA	0	0	0	Res_0	2.33333
H122	B	A	BA	0	0	0	Res_0	2.16667
H123	B	B	BB	0	1	1	Res_1	1
H124	B	B	BB	0	1	1	Res_1	2.5
H126	B	B	BB	0	1	1	Res_1	1.33333
H128	B	A	BA	0	0	0	Res_0	1.83333
H130	A	A	AA	1	0	1	Res_1	1.33333
H131	B	A	BA	0	0	0	Res_0	1.5
H132	B	A	BA	0	0	0	Res_0	2.25
H133	A	B	AB	1	1	2	Res_2	1
H134	B	A	BA	0	0	0	Res_0	2.16667
H135	B	A	BA	0	0	0	Res_0	2
H136	B	A	BA	0	0	0	Res_0	1.33333
H143	A	B	AB	1	1	2	Res_2	1.5
H145	B	B	BB	0	1	1	Res_1	1.5
H146	A	B	AB	1	1	2	Res_2	1.16667
H147	B	A	BA	0	0	0	Res_0	1.33333
H148	B	A	BA	0	0	0	Res_0	2.33333
H151	A	B	AB	1	1	2	Res_2	-
H152	A	A	AA	1	0	1	Res_1	1.5
H153	A	B	AB	1	1	2	Res_2	-
H156	B	A	BA	0	0	0	Res_0	1.66667
H161	A	A	AA	1	0	1	Res_1	1.5
H163	B	B	BB	0	1	1	Res_1	1.83333
H167	A	A	AA	1	0	1	Res_1	1.83333
H176	B	B	BB	0	1	1	Res_1	1.5
H177	A	B	AB	1	1	2	Res_2	1.16667
H178	B	A	BA	0	0	0	Res_0	1.75
H179	A	A	AA	1	0	1	Res_1	1.16667
H181	A	A	AA	1	0	1	Res_1	1.66667
H184	A	A	AA	1	0	1	Res_1	1.66667
H187	B	B	BB	0	1	1	Res_1	2.16667
H190	B	B	BB	0	1	1	Res_1	1.83333
H191	A	A	AA	1	0	1	Res_1	1
H192	A	B	AB	1	1	2	Res_2	1
H193	A	A	AA	1	0	1	Res_1	1.16667
H195	A	A	AA	1	0	1	Res_1	1.5
H196	A	A	AA	1	0	1	Res_1	-
H207	A	B	AB	1	1	2	Res_2	1
H208	B	A	BA	0	0	0	Res_0	2.16667
H210	B	B	BB	0	1	1	Res_1	1.75
H211	A	A	AA	1	0	1	Res_1	1.5
H214	A	B	AB	1	1	2	Res_2	1
H216	A	A	AA	1	0	1	Res_1	2.25
H217	A	A	AA	1	0	1	Res_1	1.33333
H223	A	A	AA	1	0	1	Res_1	1.16667
H225	B	B	BB	0	1	1	Res_1	2
H226	A	A	AA	1	0	1	Res_1	1.33333
H227	B	A	BA	0	0	0	Res_0	2.16667
H228	A	A	AA	1	0	1	Res_1	1.5
H230	B	B	BB	0	1	1	Res_1	2
H231	B	B	BB	0	1	1	Res_1	1.33333
H232	B	A	BA	0	0	0	Res_0	2.5
H234	A	B	AB	1	1	2	Res_2	-
H235	B	A	BA	0	0	0	Res_0	1.83333
H236	A	A	AA	1	0	1	Res_1	1.5
H237	B	A	BA	0	0	0	Res_0	2.16667
H238	B	A	BA	0	0	0	Res_0	2
H242	B	A	BA	0	0	0	Res_0	1.83333
H244	B	A	BA	0	0	0	Res_0	2.66667
H247	A	B	AB	1	1	2	Res_2	1
H248	A	B	AB	1	1	2	Res_2	1.66667
H251	B	A	BA	0	0	0	Res_0	1.5
H252	A	B	AB	1	1	2	Res_2	1
H255	B	A	BA	0	0	0	Res_0	1.83333
H256	B	B	BB	0	1	1	Res_1	1.66667
H258	A	A	AA	1	0	1	Res_1	1
H259	B	A	BA	0	0	0	Res_0	2.33333
H263	A	B	AB	1	1	2	Res_2	2.5
H264	B	A	BA	0	0	0	Res_0	2.33333
H265	A	B	AB	1	1	2	Res_2	1.33333
H266	B	B	BB	0	1	1	Res_1	1.5
H267	B	B	BB	0	1	1	Res_1	1.83333
H272	B	A	BA	0	0	0	Res_0	3.16667
H274	A	B	AB	1	1	2	Res_2	1.16667
H275	B	A	BA	0	0	0	Res_0	1.5
H285	A	A	AA	1	0	1	Res_1	1.83333
H286	A	A	AA	1	0	1	Res_1	1.33333
H287	A	B	AB	1	1	2	Res_2	1.16667
H289	A	B	AB	1	1	2	Res_2	1.33333
H291	A	B	AB	1	1	2	Res_2	1
H295	A	A	AA	1	0	1	Res_1	2.16667
H296	A	A	AA	1	0	1	Res_1	1.33333
H298	B	A	BA	0	0	0	Res_0	2
H300	A	A	AA	1	0	1	Res_1	1.16667
H304	B	A	BA	0	0	0	Res_0	2.5
H305	B	A	BA	0	0	0	Res_0	2.66667
H306	B	B	BB	0	1	1	Res_1	1.25
H307	B	A	BA	0	0	0	Res_0	2
H308	A	A	AA	1	0	1	Res_1	1
H309	A	A	AA	1	0	1	Res_1	-
H312	B	A	BA	0	0	0	Res_0	2
H314	B	B	BB	0	1	1	Res_1	1.5
H316	B	A	BA	0	0	0	Res_0	-
H318	B	A	BA	0	0	0	Res_0	2
H321	A	A	AA	1	0	1	Res_1	1
H323	A	B	AB	1	1	2	Res_2	1
H324	A	A	AA	1	0	1	Res_1	1.5
H327	A	A	AA	1	0	1	Res_1	1
H328	B	A	BA	0	0	0	Res_0	1.66667
H331	B	B	BB	0	1	1	Res_1	1.83333
H333	B	A	BA	0	0	0	Res_0	2.16667
H336	B	A	BA	0	0	0	Res_0	1.83333
H339	A	B	AB	1	1	2	Res_2	1.16667
H341	B	A	BA	0	0	0	Res_0	2.66667
H342	A	A	AA	1	0	1	Res_1	2.16667
H343	B	B	BB	0	1	1	Res_1	2
H344	A	B	AB	1	1	2	Res_2	1.66667
H345	B	B	BB	0	1	1	Res_1	1.5
H346	B	B	BB	0	1	1	Res_1	1.33333
H348	B	A	BA	0	0	0	Res_0	2.33333
H349	A	A	AA	1	0	1	Res_1	1.33333
H352	B	A	BA	0	0	0	Res_0	1.66667
H353	B	B	BB	0	1	1	Res_1	2.16667
H359	B	A	BA	0	0	0	Res_0	2.16667
H361	B	A	BA	0	0	0	Res_0	2.66667
H362	A	A	AA	1	0	1	Res_1	1.83333
H363	B	A	BA	0	0	0	Res_0	1.5
H364	B	B	BB	0	1	1	Res_1	2
H366	A	A	AA	1	0	1	Res_1	1.33333
H369	B	A	BA	0	0	0	Res_0	2
H370	B	A	BA	0	0	0	Res_0	2.5
H374	B	A	BA	0	0	0	Res_0	2.16667
H379	B	B	BB	0	1	1	Res_1	1.66667
H384	B	A	BA	0	0	0	Res_0	2
H385	A	B	AB	1	1	2	Res_2	1
H386	B	B	BB	0	1	1	Res_1	2.25
H388	B	A	BA	0	0	0	Res_0	2.5
H392	A	A	AA	1	0	1	Res_1	-
H398	B	A	BA	0	0	0	Res_0	-
H401	B	B	BB	0	1	1	Res_1	2
H402	B	B	BB	0	1	1	Res_1	1.5
H405	B	B	BB	0	1	1	Res_1	2.5
H406	B	A	BA	0	0	0	Res_0	2
H408	A	A	AA	1	0	1	Res_1	2.25
H410	B	A	BA	0	0	0	Res_0	2
H411	B	B	BB	0	1	1	Res_1	1.5
H412	A	A	AA	1	0	1	Res_1	1
H414	A	A	AA	1	0	1	Res_1	2
H416	A	B	AB	1	1	2	Res_2	1.33333
H418	A	B	AB	1	1	2	Res_2	1
H419	A	B	AB	1	1	2	Res_2	1
H420	A	A	AA	1	0	1	Res_1	1.66667
H421	B	B	BB	0	1	1	Res_1	2.5
H422	A	B	AB	1	1	2	Res_2	1.33333
H423	A	A	AA	1	0	1	Res_1	1
H424	A	B	AB	1	1	2	Res_2	1.33333
H428	A	A	AA	1	0	1	Res_1	1.5
H429	A	A	AA	1	0	1	Res_1	1
H430	B	A	BA	0	0	0	Res_0	1.83333
H433	B	B	BB	0	1	1	Res_1	1.83333
H434	A	A	AA	1	0	1	Res_1	1.16667
H435	B	A	BA	0	0	0	Res_0	1.75
H438	B	A	BA	0	0	0	Res_0	2.16667
H440	A	A	AA	1	0	1	Res_1	1.33333
H441	A	A	AA	1	0	1	Res_1	1
H446	B	B	BB	0	1	1	Res_1	1.5
H447	B	B	BB	0	1	1	Res_1	1.66667
H449	B	B	BB	0	1	1	Res_1	1.83333
H450	B	A	BA	0	0	0	Res_0	2.5
H451	B	B	BB	0	1	1	Res_1	1.66667
H452	A	A	AA	1	0	1	Res_1	2
H455	A	A	AA	1	0	1	Res_1	1
H462	B	A	BA	0	0	0	Res_0	1.5
H463	B	A	BA	0	0	0	Res_0	1.5
H464	B	B	BB	0	1	1	Res_1	2.16667
H466	A	A	AA	1	0	1	Res_1	1.5
H467	B	B	BB	0	1	1	Res_1	1.83333
H475	A	B	AB	1	1	2	Res_2	1.66667
H477	B	A	BA	0	0	0	Res_0	2
H478	B	A	BA	0	0	0	Res_0	1.83333
H482	B	B	BB	0	1	1	Res_1	1.66667
H484	A	B	AB	1	1	2	Res_2	1
H485	A	A	AA	1	0	1	Res_1	1
H486	A	A	AA	1	0	1	Res_1	1.66667
H489	A	A	AA	1	0	1	Res_1	1.16667
H491	A	A	AA	1	0	1	Res_1	1.66667
H492	B	A	BA	0	0	0	Res_0	1.66667
H493	A	A	AA	1	0	1	Res_1	1.16667
H494	A	B	AB	1	1	2	Res_2	1.33333
H498	A	A	AA	1	0	1	Res_1	1
H504	B	B	BB	0	1	1	Res_1	2
H506	B	B	BB	0	1	1	Res_1	2.33333
H507	B	B	BB	0	1	1	Res_1	2
H509	A	B	AB	1	1	2	Res_2	1
H511	B	B	BB	0	1	1	Res_1	1.5
H514	A	B	AB	1	1	2	Res_2	1.16667
H516	A	A	AA	1	0	1	Res_1	1.16667
H517	B	A	BA	0	0	0	Res_0	1.83333
H520	A	A	AA	1	0	1	Res_1	2
H521	B	B	BB	0	1	1	Res_1	1.33333
H526	A	B	AB	1	1	2	Res_2	1
H527	A	B	AB	1	1	2	Res_2	1.16667
H529	A	A	AA	1	0	1	Res_1	1.5
H530	B	A	BA	0	0	0	Res_0	1.5

## Sheet: Stacking_Res_Seed_SNB_Northam
DH105x56	QSnb.cur–2A1_56	QSnb.Ts.cur–2D1_56	QSnb.cur–2D2_56	QSnb.cur–2D3_56	Genotype	Num.Res.56:ZWB11	Total.Res.Loci	Group	Seedling_SNB_Nortahm_WGT
H001	A	A	A	B	AAAB	1	1	Res_1	3.67
H003	B	B	B	B	BBBB	4	4	Res_4	2.33
H004	A	A	B	B	AABB	2	2	Res_2	5.17
H006	B	B	A	A	BBAA	2	2	Res_2	4.67
H009	B	B	B	A	BBBA	3	3	Res_3	2
H010	A	A	A	A	AAAA	0	0	Res_0	3.67
H011	A	A	A	A	AAAA	0	0	Res_0	5.5
H012	B	B	B	A	BBBA	3	3	Res_3	5
H013	B	A	A	A	BAAA	1	1	Res_1	3
H014	B	B	A	A	BBAA	2	2	Res_2	3
H017	B	B	B	B	BBBB	4	4	Res_4	2.33
H018	A	A	A	A	AAAA	0	0	Res_0	5
H019	B	B	B	B	BBBB	4	4	Res_4	4.83
H033	A	A	A	B	AAAB	1	1	Res_1	5.67
H036	A	A	A	A	AAAA	0	0	Res_0	3.33
H040	B	B	B	A	BBBA	3	3	Res_3	2.67
H043	B	B	A	A	BBAA	2	2	Res_2	4.17
H047	A	A	B	A	AABA	1	1	Res_1	2.33
H052	A	A	A	A	AAAA	0	0	Res_0	5.17
H054	B	B	B	B	BBBB	4	4	Res_4	2.33
H056	A	B	A	A	ABAA	1	1	Res_1	5.33
H058	A	B	A	A	ABAA	1	1	Res_1	5.33
H061	B	A	B	A	BABA	2	2	Res_2	4.67
H063	A	A	B	A	AABA	1	1	Res_1	4.67
H064	B	B	B	A	BBBA	3	3	Res_3	1.67
H065	A	A	A	A	AAAA	0	0	Res_0	4.5
H067	B	A	A	A	BAAA	1	1	Res_1	5
H072	A	A	A	A	AAAA	0	0	Res_0	4.33
H073	A	B	A	B	ABAB	2	2	Res_2	4.83
H075	B	B	B	B	BBBB	4	4	Res_4	1.33
H078	B	A	B	A	BABA	2	2	Res_2	2.67
H081	A	A	A	B	AAAB	1	1	Res_1	2.67
H082	A	B	B	A	ABBA	2	2	Res_2	4.67
H087	B	A	A	A	BAAA	1	1	Res_1	6
H088	B	B	A	A	BBAA	2	2	Res_2	3
H089	A	A	B	A	AABA	1	1	Res_1	4.67
H091	A	A	A	B	AAAB	1	1	Res_1	3.67
H093	B	A	A	B	BAAB	2	2	Res_2	5
H095	B	A	B	A	BABA	2	2	Res_2	4.33
H096	B	B	A	A	BBAA	2	2	Res_2	4.33
H098	B	B	B	B	BBBB	4	4	Res_4	4.33
H102	B	A	A	A	BAAA	1	1	Res_1	3.67
H112	A	B	B	B	ABBB	3	3	Res_3	3
H115	A	A	A	A	AAAA	0	0	Res_0	5
H116	B	B	A	A	BBAA	2	2	Res_2	4
H118	A	B	A	A	ABAA	1	1	Res_1	6
H120	B	A	B	B	BABB	3	3	Res_3	5.67
H122	B	A	A	A	BAAA	1	1	Res_1	6
H123	B	B	B	B	BBBB	4	4	Res_4	1.33
H124	B	B	A	B	BBAB	3	3	Res_3	4.33
H126	B	B	A	A	BBAA	2	2	Res_2	4.67
H128	A	A	A	A	AAAA	0	0	Res_0	6
H130	B	A	A	A	BAAA	1	1	Res_1	3.83
H131	A	A	A	A	AAAA	0	0	Res_0	5.67
H132	B	A	A	B	BAAB	2	2	Res_2	6
H133	A	B	B	A	ABBA	2	2	Res_2	5.33
H134	B	A	A	B	BAAB	2	2	Res_2	4
H135	B	A	A	A	BAAA	1	1	Res_1	6
H136	B	A	A	A	BAAA	1	1	Res_1	5.67
H143	B	B	A	A	BBAA	2	2	Res_2	6
H145	A	B	B	A	ABBA	2	2	Res_2	6.33
H146	B	B	A	A	BBAA	2	2	Res_2	5.67
H147	A	A	A	B	AAAB	1	1	Res_1	4
H148	A	A	B	A	AABA	1	1	Res_1	5.17
H151	A	B	B	A	ABBA	2	2	Res_2	5.33
H152	A	A	A	A	AAAA	0	0	Res_0	6.33
H153	A	B	B	A	ABBA	2	2	Res_2	-
H156	A	A	A	A	AAAA	0	0	Res_0	4.33
H161	A	A	A	A	AAAA	0	0	Res_0	6.67
H163	A	B	B	B	ABBB	3	3	Res_3	4
H167	B	A	A	A	BAAA	1	1	Res_1	5.5
H176	A	B	B	B	ABBB	3	3	Res_3	3.67
H177	B	B	B	A	BBBA	3	3	Res_3	3.33
H178	A	A	A	A	AAAA	0	0	Res_0	5.33
H179	A	A	A	A	AAAA	0	0	Res_0	7
H181	A	A	A	B	AAAB	1	1	Res_1	5.67
H184	A	A	A	A	AAAA	0	0	Res_0	5.33
H187	B	B	B	B	BBBB	4	4	Res_4	3.67
H190	A	B	A	A	ABAA	1	1	Res_1	6.17
H191	B	A	A	A	BAAA	1	1	Res_1	4.67
H192	A	B	B	A	ABBA	2	2	Res_2	4.67
H193	B	A	A	A	BAAA	1	1	Res_1	5
H195	A	A	A	A	AAAA	0	0	Res_0	6.67
H196	B	A	A	A	BAAA	1	1	Res_1	4
H207	B	B	B	A	BBBA	3	3	Res_3	2.67
H208	A	A	A	B	AAAB	1	1	Res_1	1.67
H210	A	B	B	A	ABBA	2	2	Res_2	6
H211	A	A	A	A	AAAA	0	0	Res_0	6.67
H214	B	B	B	A	BBBA	3	3	Res_3	4
H216	A	A	A	B	AAAB	1	1	Res_1	5
H217	A	A	A	A	AAAA	0	0	Res_0	6.17
H223	A	A	A	A	AAAA	0	0	Res_0	6
H225	B	B	B	A	BBBA	3	3	Res_3	6.33
H226	B	A	B	A	BABA	2	2	Res_2	4
H227	A	A	A	A	AAAA	0	0	Res_0	5
H228	A	A	A	A	AAAA	0	0	Res_0	3
H230	A	B	B	A	ABBA	2	2	Res_2	3.67
H231	B	B	B	A	BBBA	3	3	Res_3	2.67
H232	B	A	A	A	BAAA	1	1	Res_1	2.67
H234	A	B	A	A	ABAA	1	1	Res_1	-
H235	A	A	A	B	AAAB	1	1	Res_1	4.33
H236	B	A	A	B	BAAB	2	2	Res_2	3.67
H237	A	A	A	A	AAAA	0	0	Res_0	4.33
H238	A	A	A	A	AAAA	0	0	Res_0	5.33
H242	A	A	B	A	AABA	1	1	Res_1	6
H244	A	A	A	A	AAAA	0	0	Res_0	5.33
H247	A	B	B	A	ABBA	2	2	Res_2	4.67
H248	A	B	B	A	ABBA	2	2	Res_2	4.33
H251	A	A	B	B	AABB	2	2	Res_2	3.33
H252	B	B	B	A	BBBA	3	3	Res_3	3
H255	A	A	A	A	AAAA	0	0	Res_0	3.67
H256	B	B	B	A	BBBA	3	3	Res_3	3.67
H258	B	A	A	A	BAAA	1	1	Res_1	5
H259	A	A	A	A	AAAA	0	0	Res_0	4.67
H263	A	B	B	A	ABBA	2	2	Res_2	2.67
H264	A	A	A	A	AAAA	0	0	Res_0	4.67
H265	A	B	A	A	ABAA	1	1	Res_1	4
H266	B	B	B	A	BBBA	3	3	Res_3	4.67
H267	B	B	A	A	BBAA	2	2	Res_2	5
H272	A	A	A	B	AAAB	1	1	Res_1	7.5
H274	B	B	A	A	BBAA	2	2	Res_2	3.33
H275	A	A	A	B	AAAB	1	1	Res_1	5
H285	B	A	A	B	BAAB	2	2	Res_2	1.33
H286	A	A	A	A	AAAA	0	0	Res_0	3
H287	B	B	B	A	BBBA	3	3	Res_3	3.67
H289	A	B	B	A	ABBA	2	2	Res_2	5.67
H291	B	B	B	A	BBBA	3	3	Res_3	3.33
H295	A	A	B	B	AABB	2	2	Res_2	4.33
H296	B	A	B	B	BABB	3	3	Res_3	5.33
H298	A	A	A	A	AAAA	0	0	Res_0	4.5
H300	A	A	B	B	AABB	2	2	Res_2	2.67
H304	B	A	A	A	BAAA	1	1	Res_1	5.83
H305	B	A	A	B	BAAB	2	2	Res_2	5.33
H306	B	B	B	A	BBBA	3	3	Res_3	4.17
H307	B	A	B	A	BABA	2	2	Res_2	2.33
H308	A	A	B	B	AABB	2	2	Res_2	2.33
H309	B	A	A	A	BAAA	1	1	Res_1	3.33
H312	B	A	A	A	BAAA	1	1	Res_1	5
H314	B	B	B	A	BBBA	3	3	Res_3	4.67
H316	B	A	B	A	BABA	2	2	Res_2	-
H318	A	A	A	A	AAAA	0	0	Res_0	5.33
H321	B	A	A	A	BAAA	1	1	Res_1	4.33
H323	B	B	A	A	BBAA	2	2	Res_2	2.17
H324	A	A	A	A	AAAA	0	0	Res_0	4.67
H327	A	A	A	B	AAAB	1	1	Res_1	3
H328	B	A	A	A	BAAA	1	1	Res_1	5.67
H331	B	B	B	B	BBBB	4	4	Res_4	4.67
H333	B	A	B	A	BABA	2	2	Res_2	6
H336	A	A	B	A	AABA	1	1	Res_1	5
H339	B	B	B	A	BBBA	3	3	Res_3	3.67
H341	A	A	A	A	AAAA	0	0	Res_0	4.67
H342	A	A	A	B	AAAB	1	1	Res_1	5
H343	B	B	B	A	BBBA	3	3	Res_3	3
H344	A	B	A	B	ABAB	2	2	Res_2	4
H345	A	B	A	A	ABAA	1	1	Res_1	3.33
H346	A	B	B	A	ABBA	2	2	Res_2	5
H348	A	A	A	B	AAAB	1	1	Res_1	5
H349	A	A	A	A	AAAA	0	0	Res_0	6
H352	A	A	A	A	AAAA	0	0	Res_0	5
H353	A	B	A	B	ABAB	2	2	Res_2	5
H359	A	A	A	A	AAAA	0	0	Res_0	5.33
H361	A	A	A	A	AAAA	0	0	Res_0	6
H362	A	A	A	A	AAAA	0	0	Res_0	5.33
H363	A	A	A	A	AAAA	0	0	Res_0	6.17
H364	A	B	B	B	ABBB	3	3	Res_3	4
H366	B	A	B	A	BABA	2	2	Res_2	4.67
H369	A	A	A	A	AAAA	0	0	Res_0	5.17
H370	B	A	B	B	BABB	3	3	Res_3	3.67
H374	A	A	A	A	AAAA	0	0	Res_0	5.5
H379	A	B	B	A	ABBA	2	2	Res_2	5.67
H384	A	A	A	A	AAAA	0	0	Res_0	4.67
H385	A	B	A	B	ABAB	2	2	Res_2	5.67
H386	B	B	A	A	BBAA	2	2	Res_2	3.67
H388	A	A	A	A	AAAA	0	0	Res_0	3.33
H392	A	A	A	A	AAAA	0	0	Res_0	-
H398	A	A	A	B	AAAB	1	1	Res_1	5
H401	B	B	A	A	BBAA	2	2	Res_2	4.33
H402	A	B	B	B	ABBB	3	3	Res_3	5
H405	A	B	A	A	ABAA	1	1	Res_1	6.5
H406	A	A	A	B	AAAB	1	1	Res_1	4.33
H408	A	A	A	A	AAAA	0	0	Res_0	4.67
H410	A	A	B	A	AABA	1	1	Res_1	5.67
H411	B	B	B	B	BBBB	4	4	Res_4	3.67
H412	A	A	A	A	AAAA	0	0	Res_0	6.67
H414	A	A	A	B	AAAB	1	1	Res_1	3
H416	A	B	B	A	ABBA	2	2	Res_2	4.33
H418	A	B	B	B	ABBB	3	3	Res_3	4
H419	B	B	B	B	BBBB	4	4	Res_4	4.33
H420	B	A	B	B	BABB	3	3	Res_3	2.33
H421	B	B	B	B	BBBB	4	4	Res_4	2.67
H422	A	B	B	A	ABBA	2	2	Res_2	4
H423	A	A	A	A	AAAA	0	0	Res_0	6.33
H424	A	B	B	B	ABBB	3	3	Res_3	3.67
H428	B	A	A	A	BAAA	1	1	Res_1	3.67
H429	B	A	A	A	BAAA	1	1	Res_1	4.5
H430	B	A	A	B	BAAB	2	2	Res_2	4.33
H433	B	B	B	B	BBBB	4	4	Res_4	3.67
H434	B	A	A	B	BAAB	2	2	Res_2	3.67
H435	B	A	B	B	BABB	3	3	Res_3	4.33
H438	A	A	A	A	AAAA	0	0	Res_0	6.33
H440	A	A	A	A	AAAA	0	0	Res_0	5.67
H441	B	A	B	A	BABA	2	2	Res_2	3.67
H446	B	B	A	A	BBAA	2	2	Res_2	3
H447	B	B	B	A	BBBA	3	3	Res_3	3
H449	B	B	A	B	BBAB	3	3	Res_3	2.33
H450	A	A	A	A	AAAA	0	0	Res_0	5.67
H451	B	B	A	A	BBAA	2	2	Res_2	3
H452	A	A	A	A	AAAA	0	0	Res_0	5
H455	A	A	A	A	AAAA	0	0	Res_0	5
H462	A	A	A	A	AAAA	0	0	Res_0	5.33
H463	A	A	B	B	AABB	2	2	Res_2	5.67
H464	A	B	B	B	ABBB	3	3	Res_3	2.67
H466	A	A	A	A	AAAA	0	0	Res_0	4
H467	A	B	B	B	ABBB	3	3	Res_3	2.33
H475	A	B	A	B	ABAB	2	2	Res_2	5
H477	A	A	B	A	AABA	1	1	Res_1	2.5
H478	A	A	B	B	AABB	2	2	Res_2	3.83
H482	B	B	B	A	BBBA	3	3	Res_3	2.67
H484	B	B	B	A	BBBA	3	3	Res_3	3
H485	B	A	A	A	BAAA	1	1	Res_1	4.33
H486	B	A	A	A	BAAA	1	1	Res_1	5.33
H489	A	A	A	B	AAAB	1	1	Res_1	4
H491	A	A	A	A	AAAA	0	0	Res_0	7
H492	A	A	A	A	AAAA	0	0	Res_0	4.33
H493	B	A	A	A	BAAA	1	1	Res_1	5.5
H494	A	B	A	B	ABAB	2	2	Res_2	4.67
H498	B	A	A	A	BAAA	1	1	Res_1	6.67
H504	A	B	B	A	ABBA	2	2	Res_2	5.33
H506	A	B	B	A	ABBA	2	2	Res_2	3.67
H507	A	B	A	A	ABAA	1	1	Res_1	6.83
H509	A	B	B	A	ABBA	2	2	Res_2	4.33
H511	A	B	A	B	ABAB	2	2	Res_2	5.67
H514	A	B	A	A	ABAA	1	1	Res_1	4.67
H516	A	A	B	A	AABA	1	1	Res_1	4.67
H517	A	A	A	B	AAAB	1	1	Res_1	4.67
H520	A	A	A	A	AAAA	0	0	Res_0	3.33
H521	B	B	B	B	BBBB	4	4	Res_4	3.33
H526	A	B	A	A	ABAA	1	1	Res_1	6.33
H527	A	B	A	A	ABAA	1	1	Res_1	5.33
H529	A	A	B	A	AABA	1	1	Res_1	4
H530	A	A	A	A	AAAA	0	0	Res_0	4.67

## Sheet: Stacking_Res_Seed_SNB_16FG168
DH105x56	QSnb.cur–2A1_56	QSnb.cur–2D3_56	QSnb.cur–5B_56	QSnb.cur–7B1_56	Genotype	Num.Res.56:ZWB11	Total.Res.Loci	Group	Seedling_SNB_16FG168
H001	A	B	B	B	ABBB	3	3	Res_3	2
H003	B	B	A	B	BBAB	3	3	Res_3	1.66667
H004	A	B	A	A	ABAA	1	1	Res_1	4
H006	B	B	B	B	BBBB	4	4	Res_4	2.33333
H009	B	A	A	A	BAAA	1	1	Res_1	2.83333
H010	A	B	B	B	ABBB	3	3	Res_3	2.33333
H011	A	A	A	B	AAAB	1	1	Res_1	2.66667
H012	B	A	A	A	BAAA	1	1	Res_1	3.66667
H013	B	A	A	A	BAAA	1	1	Res_1	3.66667
H014	B	B	A	B	BBAB	3	3	Res_3	3.33333
H017	B	A	B	B	BABB	3	3	Res_3	2.66667
H018	A	A	B	B	AABB	2	2	Res_2	3.66667
H019	B	A	A	B	BAAB	2	2	Res_2	2.66667
H033	A	A	B	B	AABB	2	2	Res_2	3.33333
H036	A	A	B	B	AABB	2	2	Res_2	4
H040	B	B	B	B	BBBB	4	4	Res_4	2.33333
H043	B	B	A	B	BBAB	3	3	Res_3	3.33333
H047	A	A	A	B	AAAB	1	1	Res_1	2.33333
H052	A	A	A	A	AAAA	0	0	Res_0	4.66667
H054	B	B	B	B	BBBB	4	4	Res_4	2.33333
H056	A	A	A	A	AAAA	0	0	Res_0	3.66667
H058	A	A	A	A	AAAA	0	0	Res_0	3
H061	B	A	B	B	BABB	3	3	Res_3	3
H063	A	A	A	A	AAAA	0	0	Res_0	2.66667
H064	B	B	A	A	BBAA	2	2	Res_2	3
H065	A	B	B	B	ABBB	3	3	Res_3	3
H067	B	A	A	A	BAAA	1	1	Res_1	3.66667
H072	A	A	B	B	AABB	2	2	Res_2	2.33333
H073	A	A	A	A	AAAA	0	0	Res_0	3.66667
H075	B	A	A	B	BAAB	2	2	Res_2	3
H078	B	B	B	B	BBBB	4	4	Res_4	3.83333
H081	A	B	A	A	ABAA	1	1	Res_1	2.66667
H082	A	A	A	A	AAAA	0	0	Res_0	2
H087	B	A	A	A	BAAA	1	1	Res_1	3.33333
H088	B	A	A	B	BAAB	2	2	Res_2	3.33333
H089	A	B	A	A	ABAA	1	1	Res_1	4
H091	A	A	A	A	AAAA	0	0	Res_0	3.66667
H093	B	B	A	A	BBAA	2	2	Res_2	2
H095	B	A	A	A	BAAA	1	1	Res_1	3
H096	B	A	A	A	BAAA	1	1	Res_1	3.66667
H098	B	A	A	A	BAAA	1	1	Res_1	1.66667
H102	B	A	A	A	BAAA	1	1	Res_1	2.66667
H112	A	A	B	B	AABB	2	2	Res_2	1.33333
H115	A	A	A	NA	AAANA	NA	NA	NA	3.66667
H116	B	A	A	A	BAAA	1	1	Res_1	2.33333
H118	A	A	A	A	AAAA	0	0	Res_0	3.66667
H120	B	A	B	B	BABB	3	3	Res_3	3.83333
H122	B	A	A	A	BAAA	1	1	Res_1	3
H123	B	B	B	B	BBBB	4	4	Res_4	2.33333
H124	B	A	A	A	BAAA	1	1	Res_1	2.83333
H126	B	A	A	A	BAAA	1	1	Res_1	3.33333
H128	A	A	A	A	AAAA	0	0	Res_0	3.33333
H130	B	B	A	B	BBAB	3	3	Res_3	3
H131	A	A	A	A	AAAA	0	0	Res_0	3.16667
H132	B	A	A	A	BAAA	1	1	Res_1	2.33333
H133	A	B	B	B	ABBB	3	3	Res_3	3
H134	B	B	A	B	BBAB	3	3	Res_3	3.33333
H135	B	A	B	B	BABB	3	3	Res_3	3.33333
H136	B	A	A	A	BAAA	1	1	Res_1	2
H143	B	A	A	B	BAAB	2	2	Res_2	2.66667
H145	A	B	A	A	ABAA	1	1	Res_1	3
H146	B	A	A	B	BAAB	2	2	Res_2	3
H147	A	A	B	B	AABB	2	2	Res_2	2.33333
H148	A	B	A	B	ABAB	2	2	Res_2	2.83333
H151	A	A	A	B	AAAB	1	1	Res_1	4.5
H152	A	A	A	A	AAAA	0	0	Res_0	3
H153	A	A	A	A	AAAA	0	0	Res_0	3.33333
H156	A	A	A	A	AAAA	0	0	Res_0	4
H161	A	A	B	B	AABB	2	2	Res_2	5.83333
H163	A	A	A	A	AAAA	0	0	Res_0	2.66667
H167	B	B	A	A	BBAA	2	2	Res_2	3
H176	A	A	A	A	AAAA	0	0	Res_0	2
H177	B	A	B	B	BABB	3	3	Res_3	2.66667
H178	A	A	A	A	AAAA	0	0	Res_0	4.33333
H179	A	A	A	A	AAAA	0	0	Res_0	4.66667
H181	A	A	B	A	AABA	1	1	Res_1	4.33333
H184	A	A	B	B	AABB	2	2	Res_2	3.5
H187	B	B	A	B	BBAB	3	3	Res_3	3.66667
H190	A	A	A	A	AAAA	0	0	Res_0	3
H191	B	A	A	A	BAAA	1	1	Res_1	2.33333
H192	A	A	B	B	AABB	2	2	Res_2	2.66667
H193	B	A	A	B	BAAB	2	2	Res_2	3.33333
H195	A	A	B	B	AABB	2	2	Res_2	3
H196	B	B	A	B	BBAB	3	3	Res_3	2.33333
H207	B	B	B	B	BBBB	4	4	Res_4	3.33333
H208	A	B	A	B	ABAB	2	2	Res_2	2
H210	A	B	A	B	ABAB	2	2	Res_2	4.16667
H211	A	B	A	B	ABAB	2	2	Res_2	3.83333
H214	B	A	B	B	BABB	3	3	Res_3	3
H216	A	A	A	A	AAAA	0	0	Res_0	3
H217	A	B	B	B	ABBB	3	3	Res_3	5.66667
H223	A	A	A	A	AAAA	0	0	Res_0	5.33333
H225	B	B	B	B	BBBB	4	4	Res_4	3
H226	B	A	A	A	BAAA	1	1	Res_1	2.66667
H227	A	A	A	A	AAAA	0	0	Res_0	4.66667
H228	A	A	A	A	AAAA	0	0	Res_0	3.66667
H230	A	A	A	A	AAAA	0	0	Res_0	3.16667
H231	B	B	B	B	BBBB	4	4	Res_4	3.5
H232	B	A	A	A	BAAA	1	1	Res_1	2.33333
H234	A	A	A	B	AAAB	1	1	Res_1	2.33333
H235	A	A	A	A	AAAA	0	0	Res_0	2.66667
H236	B	A	B	B	BABB	3	3	Res_3	3.16667
H237	A	B	B	B	ABBB	3	3	Res_3	3.66667
H238	A	B	A	A	ABAA	1	1	Res_1	5
H242	A	A	A	A	AAAA	0	0	Res_0	5
H244	A	A	A	A	AAAA	0	0	Res_0	2
H247	A	A	A	A	AAAA	0	0	Res_0	4
H248	A	A	A	A	AAAA	0	0	Res_0	3.33333
H251	A	B	B	B	ABBB	3	3	Res_3	3
H252	B	A	B	B	BABB	3	3	Res_3	3.66667
H255	A	A	A	A	AAAA	0	0	Res_0	3.33333
H256	B	B	B	B	BBBB	4	4	Res_4	3
H258	B	A	A	A	BAAA	1	1	Res_1	2
H259	A	B	A	A	ABAA	1	1	Res_1	3.66667
H263	A	A	A	A	AAAA	0	0	Res_0	5
H264	A	A	A	A	AAAA	0	0	Res_0	3.33333
H265	A	A	B	B	AABB	2	2	Res_2	2.83333
H266	B	A	A	A	BAAA	1	1	Res_1	3.33333
H267	B	A	B	B	BABB	3	3	Res_3	2.33333
H272	A	A	A	A	AAAA	0	0	Res_0	2.33333
H274	B	A	A	A	BAAA	1	1	Res_1	3.33333
H275	A	A	A	A	AAAA	0	0	Res_0	3.83333
H285	B	B	B	B	BBBB	4	4	Res_4	1.66667
H286	A	B	A	A	ABAA	1	1	Res_1	3.66667
H287	B	A	A	A	BAAA	1	1	Res_1	2.33333
H289	A	A	B	B	AABB	2	2	Res_2	2.5
H291	B	B	B	B	BBBB	4	4	Res_4	3
H295	A	A	A	A	AAAA	0	0	Res_0	4.33333
H296	B	A	A	B	BAAB	2	2	Res_2	2.66667
H298	A	B	B	B	ABBB	3	3	Res_3	5.16667
H300	A	B	A	A	ABAA	1	1	Res_1	3.66667
H304	B	A	A	A	BAAA	1	1	Res_1	3.16667
H305	B	B	B	A	BBBA	3	3	Res_3	3.66667
H306	B	A	A	A	BAAA	1	1	Res_1	3.33333
H307	B	A	A	A	BAAA	1	1	Res_1	3
H308	A	A	A	B	AAAB	1	1	Res_1	2.66667
H309	B	A	A	B	BAAB	2	2	Res_2	3.33333
H312	B	A	A	A	BAAA	1	1	Res_1	2
H314	B	A	A	A	BAAA	1	1	Res_1	3.16667
H316	B	B	B	B	BBBB	4	4	Res_4	-
H318	A	A	B	B	AABB	2	2	Res_2	3
H321	B	A	A	A	BAAA	1	1	Res_1	2.83333
H323	B	A	A	A	BAAA	1	1	Res_1	2
H324	A	A	B	B	AABB	2	2	Res_2	2.66667
H327	A	A	A	A	AAAA	0	0	Res_0	1.66667
H328	B	A	A	A	BAAA	1	1	Res_1	3
H331	B	B	A	A	BBAA	2	2	Res_2	2
H333	B	A	A	A	BAAA	1	1	Res_1	3
H336	A	B	B	B	ABBB	3	3	Res_3	4.33333
H339	B	A	A	A	BAAA	1	1	Res_1	3.33333
H341	A	A	B	B	AABB	2	2	Res_2	3.66667
H342	A	B	B	B	ABBB	3	3	Res_3	4
H343	B	A	A	A	BAAA	1	1	Res_1	3
H344	A	A	B	B	AABB	2	2	Res_2	3
H345	A	A	A	A	AAAA	0	0	Res_0	1.66667
H346	A	A	B	B	AABB	2	2	Res_2	4.33333
H348	A	A	B	B	AABB	2	2	Res_2	3.33333
H349	A	A	B	B	AABB	2	2	Res_2	3
H352	A	A	A	B	AAAB	1	1	Res_1	3
H353	A	B	B	B	ABBB	3	3	Res_3	3.66667
H359	A	A	A	A	AAAA	0	0	Res_0	4
H361	A	A	A	B	AAAB	1	1	Res_1	3
H362	A	B	B	B	ABBB	3	3	Res_3	3
H363	A	A	B	B	AABB	2	2	Res_2	3.5
H364	A	A	B	B	AABB	2	2	Res_2	2
H366	B	B	A	B	BBAB	3	3	Res_3	2.33333
H369	A	A	A	A	AAAA	0	0	Res_0	4.66667
H370	B	A	A	B	BAAB	2	2	Res_2	2.66667
H374	A	A	A	A	AAAA	0	0	Res_0	2.5
H379	A	B	A	A	ABAA	1	1	Res_1	3.33333
H384	A	A	B	A	AABA	1	1	Res_1	4
H385	A	B	B	B	ABBB	3	3	Res_3	2.66667
H386	B	A	A	A	BAAA	1	1	Res_1	2.83333
H388	A	A	A	A	AAAA	0	0	Res_0	4.16667
H392	A	A	A	A	AAAA	0	0	Res_0	2.33333
H398	A	B	B	B	ABBB	3	3	Res_3	2.66667
H401	B	A	A	A	BAAA	1	1	Res_1	3.33333
H402	A	A	B	B	AABB	2	2	Res_2	3.66667
H405	A	A	A	A	AAAA	0	0	Res_0	1.66667
H406	A	A	A	A	AAAA	0	0	Res_0	2.66667
H408	A	B	B	B	ABBB	3	3	Res_3	2.33333
H410	A	A	B	B	AABB	2	2	Res_2	4.33333
H411	B	A	A	A	BAAA	1	1	Res_1	3
H412	A	A	B	B	AABB	2	2	Res_2	3
H414	A	A	A	A	AAAA	0	0	Res_0	2.83333
H416	A	A	A	A	AAAA	0	0	Res_0	3
H418	A	A	A	A	AAAA	0	0	Res_0	4.33333
H419	B	B	A	A	BBAA	2	2	Res_2	3
H420	B	B	A	B	BBAB	3	3	Res_3	2
H421	B	A	B	B	BABB	3	3	Res_3	3.66667
H422	A	B	A	B	ABAB	2	2	Res_2	3
H423	A	B	B	B	ABBB	3	3	Res_3	5.33333
H424	A	B	A	B	ABAB	2	2	Res_2	3.33333
H428	B	A	B	B	BABB	3	3	Res_3	3
H429	B	B	B	B	BBBB	4	4	Res_4	2.66667
H430	B	A	B	A	BABA	2	2	Res_2	2.66667
H433	B	A	A	A	BAAA	1	1	Res_1	3.5
H434	B	A	A	A	BAAA	1	1	Res_1	2.33333
H435	B	B	B	B	BBBB	4	4	Res_4	3
H438	A	A	A	B	AAAB	1	1	Res_1	4.5
H440	A	B	A	A	ABAA	1	1	Res_1	4.16667
H441	B	A	A	A	BAAA	1	1	Res_1	2
H446	B	B	A	A	BBAA	2	2	Res_2	2.66667
H447	B	A	A	A	BAAA	1	1	Res_1	2.33333
H449	B	B	A	B	BBAB	3	3	Res_3	3.33333
H450	A	A	B	B	AABB	2	2	Res_2	3.66667
H451	B	A	A	A	BAAA	1	1	Res_1	2.33333
H452	A	A	A	A	AAAA	0	0	Res_0	2.66667
H455	A	A	A	A	AAAA	0	0	Res_0	4.33333
H462	A	A	B	B	AABB	2	2	Res_2	3
H463	A	A	B	B	AABB	2	2	Res_2	3.33333
H464	A	A	A	A	AAAA	0	0	Res_0	1.66667
H466	A	A	A	A	AAAA	0	0	Res_0	2.66667
H467	A	B	B	B	ABBB	3	3	Res_3	1.5
H475	A	A	A	B	AAAB	1	1	Res_1	3.33333
H477	A	A	A	A	AAAA	0	0	Res_0	3
H478	A	B	A	B	ABAB	2	2	Res_2	3.5
H482	B	A	A	A	BAAA	1	1	Res_1	3.33333
H484	B	A	B	B	BABB	3	3	Res_3	3
H485	B	B	B	B	BBBB	4	4	Res_4	3.66667
H486	B	A	A	B	BAAB	2	2	Res_2	3.66667
H489	A	A	A	A	AAAA	0	0	Res_0	4
H491	A	A	A	A	AAAA	0	0	Res_0	3
H492	A	A	B	B	AABB	2	2	Res_2	3.33333
H493	B	B	A	B	BBAB	3	3	Res_3	4.33333
H494	A	B	B	B	ABBB	3	3	Res_3	3.66667
H498	B	B	A	B	BBAB	3	3	Res_3	3
H504	A	A	A	A	AAAA	0	0	Res_0	3
H506	A	A	A	A	AAAA	0	0	Res_0	-
H507	A	B	B	B	ABBB	3	3	Res_3	5
H509	A	A	A	A	AAAA	0	0	Res_0	3.16667
H511	A	A	A	A	AAAA	0	0	Res_0	4
H514	A	A	A	A	AAAA	0	0	Res_0	2.66667
H516	A	B	B	B	ABBB	3	3	Res_3	3.66667
H517	A	A	A	A	AAAA	0	0	Res_0	3
H520	A	A	A	A	AAAA	0	0	Res_0	2.33333
H521	B	A	B	B	BABB	3	3	Res_3	2.66667
H526	A	A	A	B	AAAB	1	1	Res_1	5.5
H527	A	A	B	B	AABB	2	2	Res_2	3.33333
H529	A	A	A	A	AAAA	0	0	Res_0	5.33333
H530	A	A	A	A	AAAA	0	0	Res_0	3.66667

## Sheet: Stacking_Res_Adult_SNB
DH105x56	QSnb.cur–2B2_105	QSnb.cur–2D3_56	QTs.cur–3B3_105	QSnb.cur–5B_56	QSnb.cur–7B1_56	Genotype	Num.Res.56:ZWB11	Num.Res.105:ZIF14	Total.Res.Loci	Group	Adult_FL2	Adulr_FL3	Adult_allFL
H001	B	B	B	B	B	BBBBB	3	0	3	Res_3	4.83	15	6.89
H003	A	B	B	A	A	ABBAA	1	1	2	Res_2	3.33	8.25	4.14
H004	A	B	B	B	B	ABBBB	3	1	4	Res_4	2.44	3.44	2.19
H006	A	A	A	A	B	AAAAB	1	2	3	Res_3	4.11	10.56	5.67
H009	A	A	B	B	B	AABBB	2	1	3	Res_3	7	17.4	8.19
H010	B	A	B	B	B	BABBB	2	0	2	Res_2	9.22	24.56	12.56
H011	A	A	B	B	B	AABBB	2	1	3	Res_3	5.11	9.78	5.48
H012	B	A	B	A	B	BABAB	1	0	1	Res_1	8.17	13.63	8.1
H013	B	A	B	A	A	BABAA	0	0	0	Res_0	6.67	13	7.26
H014	B	A	B	A	A	BABAA	0	0	0	Res_0	25	32.14	20.38
H017	A	B	B	B	B	ABBBB	3	1	4	Res_4	11.67	23	13.26
H018	B	A	NA	B	B	BANABB	2	NA	NA	NA	4.11	19.56	8.52
H019	A	B	B	A	A	ABBAA	1	1	2	Res_2	3.17	3.33	2.17
H033	A	B	B	A	A	ABBAA	1	1	2	Res_2	4.44	14.38	6.64
H036	B	A	B	A	A	BABAA	0	0	0	Res_0	2.25	6	2.86
H040	A	A	A	A	NA	AAAANA	NA	2	NA	NA	5.5	10.25	5.55
H043	B	A	B	A	A	BABAA	0	0	0	Res_0	8.67	27.78	12.74
H047	A	A	B	A	A	AABAA	0	1	1	Res_1	1.11	2.89	1.52
H052	A	A	B	B	B	AABBB	2	1	3	Res_3	4.78	8.78	7.56
H054	A	B	B	A	B	ABBAB	2	1	3	Res_3	3.67	6.67	3.89
H056	B	A	B	A	A	BABAA	0	0	0	Res_0	13.5	25.88	14.53
H058	B	A	B	A	A	BABAA	0	0	0	Res_0	14.89	34	17.74
H061	A	A	B	B	B	AABBB	2	1	3	Res_3	1.44	3.11	1.89
H063	A	A	B	A	A	AABAA	0	1	1	Res_1	4.17	9	4.89
H064	A	A	A	A	A	AAAAA	0	2	2	Res_2	5.86	5.44	4.43
H065	A	A	B	B	A	AABBA	1	1	2	Res_2	9.33	16.78	9.04
H067	A	A	A	B	B	AAABB	2	2	4	Res_4	4.56	25	10.56
H072	A	A	A	B	B	AAABB	2	2	4	Res_4	1.67	3.25	2.49
H073	A	B	B	A	B	ABBAB	2	1	3	Res_3	4.78	16.25	7.49
H075	A	B	A	A	B	ABAAB	2	2	4	Res_4	6.78	27.78	12.11
H078	B	A	A	A	A	BAAAA	0	1	1	Res_1	3.89	8	4.67
H081	A	B	B	B	B	ABBBB	3	1	4	Res_4	-	-	-
H082	B	A	B	A	A	BABAA	0	0	0	Res_0	5.33	16.5	7.72
H087	B	A	A	A	A	BAAAA	0	1	1	Res_1	4.67	12.56	6.37
H088	B	A	A	A	A	BAAAA	0	1	1	Res_1	-	-	-
H089	A	A	A	A	A	AAAAA	0	2	2	Res_2	3.11	3.75	3.14
H091	A	B	A	B	B	ABABB	3	2	5	Res_5	2.67	6.25	3.42
H093	A	B	A	A	A	ABAAA	1	2	3	Res_3	1.25	1.22	0.94
H095	B	A	A	A	A	BAAAA	0	1	1	Res_1	4	4	3.21
H096	B	A	A	A	A	BAAAA	0	1	1	Res_1	-	-	-
H098	A	B	A	B	B	ABABB	3	2	5	Res_5	2.67	4.11	2.93
H102	B	A	B	A	A	BABAA	0	0	0	Res_0	42.78	30	28.11
H112	A	B	A	A	A	ABAAA	1	2	3	Res_3	5.44	19.11	8.93
H115	B	A	A	A	A	BAAAA	0	1	1	Res_1	3.78	10.67	5.15
H116	B	A	A	A	A	BAAAA	0	1	1	Res_1	1.89	5	2.63
H118	B	A	B	A	A	BABAA	0	0	0	Res_0	4.67	22.43	9.62
H120	A	B	A	A	A	ABAAA	1	2	3	Res_3	1.78	3.43	1.85
H122	B	A	A	A	A	BAAAA	0	1	1	Res_1	2.44	3	2.3
H123	A	B	A	B	B	ABABB	3	2	5	Res_5	1.89	3.11	1.89
H124	A	B	A	A	A	ABAAA	1	2	3	Res_3	2.78	3.67	2.67
H126	A	A	A	A	B	AAAAB	1	2	3	Res_3	4.78	17.88	8.07
H128	B	A	A	B	B	BAABB	2	1	3	Res_3	3.56	8.11	4
H130	B	A	B	B	B	BABBB	2	0	2	Res_2	7.75	13.57	8
H131	B	A	A	A	A	BAAAA	0	1	1	Res_1	7.8	13	7.21
H132	A	B	A	B	B	ABABB	3	2	5	Res_5	4.44	9.78	4.81
H133	A	A	A	B	B	AAABB	2	2	4	Res_4	2.22	4.88	2.48
H134	A	B	A	B	B	ABABB	3	2	5	Res_5	2.33	3.5	1.98
H135	B	A	A	B	B	BAABB	2	1	3	Res_3	-	-	-
H136	A	A	A	B	B	AAABB	2	2	4	Res_4	2.11	4.11	2.26
H143	A	A	B	A	B	AABAB	1	1	2	Res_2	13.67	41.13	19.38
H145	B	A	A	A	A	BAAAA	0	1	1	Res_1	-	-	-
H146	B	A	B	A	B	BABAB	1	0	1	Res_1	12.33	36.25	17.94
H147	A	B	A	B	B	ABABB	3	2	5	Res_5	1.25	3	1.49
H148	A	A	A	B	B	AAABB	2	2	4	Res_4	3.89	11.11	5.26
H151	B	A	B	A	A	BABAA	0	0	0	Res_0	13.56	28.43	14.81
H152	B	A	A	A	A	BAAAA	0	1	1	Res_1	5.33	13.56	6.63
H153	A	A	A	B	A	AAABA	1	2	3	Res_3	3.11	6.43	3.37
H156	B	A	B	A	A	BABAA	0	0	0	Res_0	5.56	9.89	6.07
H161	A	A	A	A	A	AAAAA	0	2	2	Res_2	1.89	4.11	2.33
H163	A	B	B	B	B	ABBBB	3	1	4	Res_4	2.33	7.5	3.33
H167	B	A	B	A	A	BABAA	0	0	0	Res_0	19.11	12.13	11.82
H176	A	B	B	B	B	ABBBB	3	1	4	Res_4	2.22	4.11	2.48
H177	A	A	B	B	B	AABBB	2	1	3	Res_3	2.56	7.22	3.44
H178	A	A	B	B	B	AABBB	2	1	3	Res_3	6.89	10.75	7.18
H179	B	A	A	A	A	BAAAA	0	1	1	Res_1	15.83	18.6	12.92
H181	A	B	A	B	B	ABABB	3	2	5	Res_5	4.67	6.44	3.85
H184	B	A	A	A	B	BAAAB	1	1	2	Res_2	3.33	5	3.22
H187	A	B	A	A	A	ABAAA	1	2	3	Res_3	7.22	10.89	6.89
H190	A	A	B	B	B	AABBB	2	1	3	Res_3	3.89	8.78	4.44
H191	A	A	A	A	A	AAAAA	0	2	2	Res_2	3.78	9.13	4.72
H192	B	A	A	A	A	BAAAA	0	1	1	Res_1	2	12.4	5.52
H193	B	A	B	B	B	BABBB	2	0	2	Res_2	3.56	16.22	7
H195	B	A	A	B	B	BAABB	2	1	3	Res_3	6.78	6.5	5.65
H196	A	A	B	A	A	AABAA	0	1	1	Res_1	4.89	6.38	4.16
H207	B	A	B	A	A	BABAA	0	0	0	Res_0	-	-	-
H208	A	B	B	A	B	ABBAB	2	1	3	Res_3	-	-	-
H210	A	A	A	A	A	AAAAA	0	2	2	Res_2	3.5	5.6	3.2
H211	B	A	B	A	A	BABAA	0	0	0	Res_0	3.22	6.22	3.44
H214	A	A	B	B	B	AABBB	2	1	3	Res_3	0.67	7.22	2.63
H216	A	B	B	B	B	ABBBB	3	1	4	Res_4	2.5	5.25	2.71
H217	A	A	A	A	A	AAAAA	0	2	2	Res_2	3.22	7	4.04
H223	B	A	B	A	A	BABAA	0	0	0	Res_0	15.11	38.33	19.3
H225	A	A	A	A	A	AAAAA	0	2	2	Res_2	12.78	15.33	9.48
H226	A	A	A	A	A	AAAAA	0	2	2	Res_2	1.44	3.67	1.85
H227	A	A	B	A	A	AABAA	0	1	1	Res_1	1	5.33	2.11
H228	A	A	B	A	A	AABAA	0	1	1	Res_1	-	-	-
H230	A	A	A	A	A	AAAAA	0	2	2	Res_2	8.11	15	8.52
H231	B	A	B	A	A	BABAA	0	0	0	Res_0	3	11.88	5.33
H232	B	A	B	B	B	BABBB	2	0	2	Res_2	4.22	14.43	6.74
H234	A	A	A	A	A	AAAAA	0	2	2	Res_2	9.11	32.67	14.48
H235	A	B	A	B	B	ABABB	3	2	5	Res_5	1.78	5.89	2.78
H236	A	B	B	A	A	ABBAA	1	1	2	Res_2	24.13	19.38	16.02
H237	B	A	A	A	B	BAAAB	1	1	2	Res_2	6.11	8.67	5.63
H238	A	A	A	A	A	AAAAA	0	2	2	Res_2	2.44	3.78	2.41
H242	A	A	A	A	A	AAAAA	0	2	2	Res_2	5.63	5.5	3.92
H244	A	A	B	A	A	AABAA	0	1	1	Res_1	7.25	18.14	9.05
H247	B	A	B	A	A	BABAA	0	0	0	Res_0	14.67	40	19.06
H248	A	A	B	B	B	AABBB	2	1	3	Res_3	2.56	16.67	6.78
H251	A	B	B	A	B	ABBAB	2	1	3	Res_3	4.22	8.33	4.37
H252	B	A	A	A	A	BAAAA	0	1	1	Res_1	6.22	8.25	4.97
H255	A	A	B	A	B	AABAB	1	1	2	Res_2	4.33	11.57	5.78
H256	B	A	B	A	A	BABAA	0	0	0	Res_0	21.78	33.75	20.62
H258	A	A	B	A	A	AABAA	0	1	1	Res_1	-	-	-
H259	A	A	A	A	A	AAAAA	0	2	2	Res_2	2.78	5	2.81
H263	A	A	A	B	B	AAABB	2	2	4	Res_4	7.67	17.38	8.72
H264	B	A	A	B	B	BAABB	2	1	3	Res_3	2.33	4.22	2.37
H265	A	A	A	B	B	AAABB	2	2	4	Res_4	2.67	10	4.56
H266	B	A	B	A	A	BABAA	0	0	0	Res_0	3.33	6.22	3.63
H267	B	A	B	B	B	BABBB	2	0	2	Res_2	4.33	5.5	3.44
H272	A	B	A	B	B	ABABB	3	2	5	Res_5	-	-	-
H274	A	A	A	B	B	AAABB	2	2	4	Res_4	-	-	-
H275	B	B	A	A	A	BBAAA	1	1	2	Res_2	-	-	-
H285	A	B	B	B	B	ABBBB	3	1	4	Res_4	1.89	3.13	1.89
H286	B	A	A	B	B	BAABB	2	1	3	Res_3	1.78	2.67	1.81
H287	B	A	B	A	A	BABAA	0	0	0	Res_0	6.78	11.33	6.74
H289	B	A	A	A	A	BAAAA	0	1	1	Res_1	5	9.67	5.19
H291	B	A	B	A	A	BABAA	0	0	0	Res_0	-	-	-
H295	A	B	A	A	B	ABAAB	2	2	4	Res_4	-	-	-
H296	A	B	B	A	B	ABBAB	2	1	3	Res_3	2	4.5	2.28
H298	B	A	A	A	A	BAAAA	0	1	1	Res_1	15	31.67	18.22
H300	A	B	B	B	B	ABBBB	3	1	4	Res_4	1.67	2.22	1.44
H304	A	A	B	A	B	AABAB	1	1	2	Res_2	1	3	1.44
H305	B	B	A	B	B	BBABB	3	1	4	Res_4	-	-	-
H306	A	A	B	A	A	AABAA	0	1	1	Res_1	5.33	10.89	6.26
H307	B	A	B	A	A	BABAA	0	0	0	Res_0	4	7.14	4.08
H308	A	B	B	B	B	ABBBB	3	1	4	Res_4	5.67	16.25	7.9
H309	A	A	B	A	A	AABAA	0	1	1	Res_1	14.56	21.78	12.74
H312	B	A	A	A	A	BAAAA	0	1	1	Res_1	2	5.78	2.67
H314	A	A	B	A	A	AABAA	0	1	1	Res_1	6.33	11	6.7
H316	A	A	A	A	B	AAAAB	1	2	3	Res_3	5.22	13.86	7.4
H318	A	A	A	B	B	AAABB	2	2	4	Res_4	2.44	4.11	2.33
H321	B	A	B	A	A	BABAA	0	0	0	Res_0	10.56	22.22	11.52
H323	A	A	A	B	B	AAABB	2	2	4	Res_4	12.78	14.11	9.44
H324	A	A	A	A	A	AAAAA	0	2	2	Res_2	6.67	9.56	6.04
H327	A	B	B	B	B	ABBBB	3	1	4	Res_4	1.44	8.33	3.26
H328	B	A	B	A	A	BABAA	0	0	0	Res_0	5.67	14.6	6.98
H331	A	B	A	A	A	ABAAA	1	2	3	Res_3	4.22	8.22	4.7
H333	B	A	B	A	A	BABAA	0	0	0	Res_0	6.22	7.63	6.13
H336	A	A	B	A	A	AABAA	0	1	1	Res_1	-	-	-
H339	B	A	B	B	B	BABBB	2	0	2	Res_2	5	29.17	11.87
H341	B	A	A	A	A	BAAAA	0	1	1	Res_1	-	-	-
H342	A	B	B	A	B	ABBAB	2	1	3	Res_3	4.89	10.5	5.91
H343	A	A	A	A	A	AAAAA	0	2	2	Res_2	-	-	-
H344	A	B	B	A	B	ABBAB	2	1	3	Res_3	2	4.78	2.67
H345	A	A	A	B	B	AAABB	2	2	4	Res_4	2.78	21.89	8.41
H346	A	A	A	A	A	AAAAA	0	2	2	Res_2	3.44	10.5	4.76
H348	A	B	B	A	A	ABBAA	1	1	2	Res_2	6.11	11.78	6.7
H349	A	A	A	A	A	AAAAA	0	2	2	Res_2	3	4.63	3.02
H352	B	A	A	A	B	BAAAB	1	1	2	Res_2	3.17	7.4	3.91
H353	A	B	B	A	B	ABBAB	2	1	3	Res_3	-	-	-
H359	B	A	A	A	A	BAAAA	0	1	1	Res_1	-	-	-
H361	A	A	B	A	A	AABAA	0	1	1	Res_1	7.5	12.67	7.72
H362	A	A	B	B	B	AABBB	2	1	3	Res_3	12.78	24.88	14.03
H363	B	A	A	A	A	BAAAA	0	1	1	Res_1	3.67	4	3.04
H364	A	B	A	B	B	ABABB	3	2	5	Res_5	2	7	3.22
H366	B	A	B	A	B	BABAB	1	0	1	Res_1	3.44	9.44	4.59
H369	A	A	B	A	A	AABAA	0	1	1	Res_1	10.56	18	10.67
H370	B	B	A	B	A	BBABA	2	1	3	Res_3	8.89	13.89	7.67
H374	A	A	B	A	A	AABAA	0	1	1	Res_1	2.67	9.5	4.13
H379	A	A	B	A	B	AABAB	1	1	2	Res_2	7.22	31.5	13.54
H384	A	A	B	A	A	AABAA	0	1	1	Res_1	3.78	10.22	5.07
H385	A	B	A	B	B	ABABB	3	2	5	Res_5	3.67	10.88	5.59
H386	B	A	A	A	A	BAAAA	0	1	1	Res_1	10.67	20.11	11.07
H388	B	A	A	A	A	BAAAA	0	1	1	Res_1	9.63	17.5	11.49
H392	A	A	A	A	A	AAAAA	0	2	2	Res_2	7	14.33	7.56
H398	A	B	A	A	B	ABAAB	2	2	4	Res_4	2.67	3.43	2.55
H401	A	A	A	A	B	AAAAB	1	2	3	Res_3	3.33	5	3.07
H402	A	B	B	A	B	ABBAB	2	1	3	Res_3	6.56	25	11.22
H405	B	A	B	B	B	BABBB	2	0	2	Res_2	5.67	12.8	6.71
H406	A	B	B	B	B	ABBBB	3	1	4	Res_4	1.83	2.67	1.67
H408	A	A	A	B	A	AAABA	1	2	3	Res_3	-	-	-
H410	A	A	A	A	A	AAAAA	0	2	2	Res_2	8.13	13.83	7.9
H411	A	B	B	B	B	ABBBB	3	1	4	Res_4	3.67	2.5	2.83
H412	B	A	B	A	A	BABAA	0	0	0	Res_0	3.67	3.89	2.63
H414	B	B	B	B	B	BBBBB	3	0	3	Res_3	4.78	17.33	7.7
H416	A	A	B	A	B	AABAB	1	1	2	Res_2	5.33	11.33	5.7
H418	A	B	B	A	B	ABBAB	2	1	3	Res_3	6.22	12	6.89
H419	A	B	A	A	B	ABAAB	2	2	4	Res_4	2.33	13.67	5.7
H420	A	B	A	A	B	ABAAB	2	2	4	Res_4	0.8	3.2	1.33
H421	A	B	B	B	B	ABBBB	3	1	4	Res_4	1.33	1.67	1
H422	B	A	B	A	A	BABAA	0	0	0	Res_0	-	-	-
H423	B	A	B	A	A	BABAA	0	0	0	Res_0	3.44	4.44	3.11
H424	A	B	A	A	B	ABAAB	2	2	4	Res_4	5.22	8.5	4.94
H428	B	A	B	B	B	BABBB	2	0	2	Res_2	10.44	22.67	11.59
H429	B	A	A	A	B	BAAAB	1	1	2	Res_2	4.22	9.44	4.96
H430	A	B	B	B	B	ABBBB	3	1	4	Res_4	2	13	5.15
H433	A	B	A	A	B	ABAAB	2	2	4	Res_4	1.17	1.8	1.04
H434	A	B	A	B	B	ABABB	3	2	5	Res_5	2.11	4.13	2.75
H435	A	B	A	A	A	ABAAA	1	2	3	Res_3	3.56	8.25	4.31
H438	B	A	A	A	B	BAAAB	1	1	2	Res_2	5.89	3	3.48
H440	A	A	B	A	B	AABAB	1	1	2	Res_2	17.11	40.63	20.1
H441	A	A	B	A	A	AABAA	0	1	1	Res_1	4	5.56	4.22
H446	B	A	A	A	A	BAAAA	0	1	1	Res_1	4.11	9.11	4.74
H447	B	A	A	A	A	BAAAA	0	1	1	Res_1	2.5	6.67	3.06
H449	A	B	A	B	B	ABABB	3	2	5	Res_5	2.78	4.63	2.88
H450	A	A	A	A	A	AAAAA	0	2	2	Res_2	15	37.5	20.89
H451	B	A	A	A	A	BAAAA	0	1	1	Res_1	8.63	17.22	9.1
H452	A	A	B	A	B	AABAB	1	1	2	Res_2	2.33	3.38	1.98
H455	A	A	B	A	B	AABAB	1	1	2	Res_2	3	8.78	4.33
H462	B	A	A	B	B	BAABB	2	1	3	Res_3	2.13	4.86	2.91
H463	A	B	A	A	B	ABAAB	2	2	4	Res_4	-	-	-
H464	A	B	A	B	B	ABABB	3	2	5	Res_5	1.89	8.56	3.56
H466	A	A	A	B	B	AAABB	2	2	4	Res_4	4.67	11.63	6.28
H467	A	B	A	B	B	ABABB	3	2	5	Res_5	3.56	7	3.89
H475	A	B	A	B	B	ABABB	3	2	5	Res_5	2.25	12.11	5.08
H477	B	A	B	B	B	BABBB	2	0	2	Res_2	12.11	21.88	12.74
H478	A	B	A	B	B	ABABB	3	2	5	Res_5	4.89	8.14	5.05
H482	B	A	A	A	A	BAAAA	0	1	1	Res_1	6.56	25.25	11.75
H484	B	A	B	B	B	BABBB	2	0	2	Res_2	-	-	-
H485	B	A	B	A	A	BABAA	0	0	0	Res_0	3	10.13	4.63
H486	B	A	B	A	A	BABAA	0	0	0	Res_0	5.33	24.89	10.37
H489	A	B	A	B	B	ABABB	3	2	5	Res_5	3.22	4.63	3.65
H491	A	A	B	A	A	AABAA	0	1	1	Res_1	4.22	3.25	3.34
H492	A	A	A	A	A	AAAAA	0	2	2	Res_2	4	13.89	6.44
H493	B	A	B	A	A	BABAA	0	0	0	Res_0	7.78	9.13	6.26
H494	B	B	B	A	A	BBBAA	1	0	1	Res_1	18.67	18.5	13.46
H498	A	A	A	A	A	AAAAA	0	2	2	Res_2	11.11	6.33	6.48
H504	B	A	B	A	A	BABAA	0	0	0	Res_0	4.38	25.78	10.5
H506	B	A	B	A	A	BABAA	0	0	0	Res_0	3.22	9.11	4.15
H507	A	A	A	A	A	AAAAA	0	2	2	Res_2	5.44	10.22	5.81
H509	B	A	B	A	A	BABAA	0	0	0	Res_0	4.78	7.44	5.48
H511	B	B	B	A	A	BBBAA	1	0	1	Res_1	12.88	19.25	12.52
H514	B	A	A	B	B	BAABB	2	1	3	Res_3	1	6.78	2.59
H516	A	A	A	A	A	AAAAA	0	2	2	Res_2	6.89	14.83	7.57
H517	A	B	A	A	A	ABAAA	1	2	3	Res_3	1.89	2.25	1.56
H520	A	A	B	A	A	AABAA	0	1	1	Res_1	29.89	39.33	26.26
H521	A	B	B	A	B	ABBAB	2	1	3	Res_3	5.33	13	7.04
H526	B	A	A	A	A	BAAAA	0	1	1	Res_1	7.89	8.71	6.28
H527	B	A	B	A	A	BABAA	0	0	0	Res_0	13.78	29.29	15.28
H529	B	A	B	B	B	BABBB	2	0	2	Res_2	-	-	-
H530	A	A	A	B	B	AAABB	2	2	4	Res_4	-	-	-

## Sheet: Lines_Res_both_SNB_TS
DH105x56	QTs.cur–1B_105	Group_SNB_Adult	Res_both_SNB_TS
H001	Allele_56	Res_3
H003	Allele_56	Res_2
H004	Allele_56	Res_4
H006	Allele_56	Res_3
H009	Allele_105	Res_3
H010	Allele_56	Res_2
H011	Allele_56	Res_3
H012	Allele_56	Res_1
H013	Allele_56	Res_0
H014	Allele_105	Res_0
H017	Allele_105	Res_4	1
H018	Allele_105	NA
H019	Allele_105	Res_2
H033	Allele_105	Res_2
H036	Allele_56	Res_0
H040	Allele_105	NA
H043	Allele_105	Res_0
H047	Allele_105	Res_1
H052	Allele_105	Res_3
H054	Allele_56	Res_3
H056	Allele_56	Res_0
H058	Allele_56	Res_0
H061	Allele_105	Res_3
H063	Allele_105	Res_1
H064	Allele_105	Res_2
H065	Allele_56	Res_2
H067	Allele_56	Res_4
H072	Allele_105	Res_4	1
H073	Allele_56	Res_3
H075	Allele_105	Res_4	1
H078	Allele_56	Res_1
H081	Allele_56	Res_4
H082	Allele_105	Res_0
H087	Allele_105	Res_1
H088	Allele_105	Res_1
H089	Allele_56	Res_2
H091	Allele_56	Res_5
H093	Allele_56	Res_3
H095	Allele_56	Res_1
H096	Allele_105	Res_1
H098	Allele_105	Res_5	1
H102	Allele_105	Res_0
H112	Allele_56	Res_3
H115	Allele_56	Res_1
H116	Allele_56	Res_1
H118	Allele_105	Res_0
H120	Allele_56	Res_3
H122	Allele_56	Res_1
H123	Allele_56	Res_5
H124	Allele_56	Res_3
H126	Allele_56	Res_3
H128	Allele_56	Res_3
H130	Allele_105	Res_2
H131	Allele_56	Res_1
H132	Allele_56	Res_5
H133	Allele_105	Res_4	1
H134	Allele_56	Res_5
H135	Allele_56	Res_3
H136	Allele_56	Res_4
H143	Allele_105	Res_2
H145	Allele_56	Res_1
H146	Allele_105	Res_1
H147	Allele_56	Res_5
H148	Allele_56	Res_4
H151	Allele_105	Res_0
H152	Allele_105	Res_1
H153	Allele_105	Res_3
H156	Allele_56	Res_0
H161	Allele_105	Res_2
H163	Allele_56	Res_4
H167	Allele_105	Res_0
H176	Allele_56	Res_4
H177	Allele_105	Res_3
H178	Allele_56	Res_3
H179	Allele_105	Res_1
H181	Allele_105	Res_5	1
H184	Allele_105	Res_2
H187	Allele_56	Res_3
H190	Allele_56	Res_3
H191	Allele_105	Res_2
H192	Allele_105	Res_1
H193	Allele_105	Res_2
H195	Allele_105	Res_3
H196	Allele_105	Res_1
H207	Allele_105	Res_0
H208	Allele_56	Res_3
H210	Allele_56	Res_2
H211	Allele_105	Res_0
H214	Allele_105	Res_3
H216	Allele_105	Res_4	1
H217	Allele_105	Res_2
H223	Allele_105	Res_0
H225	Allele_56	Res_2
H226	Allele_105	Res_2
H227	Allele_56	Res_1
H228	Allele_105	Res_1
H230	Allele_56	Res_2
H231	Allele_56	Res_0
H232	Allele_56	Res_2
H234	Allele_105	Res_2
H235	Allele_56	Res_5
H236	Allele_105	Res_2
H237	Allele_56	Res_2
H238	Allele_56	Res_2
H242	Allele_56	Res_2
H244	Allele_56	Res_1
H247	Allele_105	Res_0
H248	Allele_105	Res_3
H251	Allele_56	Res_3
H252	Allele_105	Res_1
H255	Allele_56	Res_2
H256	Allele_56	Res_0
H258	Allele_105	Res_1
H259	Allele_56	Res_2
H263	Allele_105	Res_4	1
H264	Allele_56	Res_3
H265	Allele_105	Res_4	1
H266	Allele_56	Res_0
H267	Allele_56	Res_2
H272	Allele_56	Res_5
H274	Allele_105	Res_4	1
H275	Allele_56	Res_2
H285	Allele_105	Res_4	1
H286	Allele_105	Res_3
H287	Allele_105	Res_0
H289	Allele_105	Res_1
H291	Allele_105	Res_0
H295	Allele_105	Res_4	1
H296	Allele_105	Res_3
H298	Allele_56	Res_1
H300	Allele_105	Res_4	1
H304	Allele_56	Res_2
H305	Allele_56	Res_4
H306	Allele_56	Res_1
H307	Allele_56	Res_0
H308	Allele_105	Res_4	1
H309	Allele_105	Res_1
H312	Allele_56	Res_1
H314	Allele_56	Res_1
H316	Allele_56	Res_3
H318	Allele_56	Res_4
H321	Allele_105	Res_0
H323	Allele_105	Res_4	1
H324	Allele_105	Res_2
H327	Allele_105	Res_4	1
H328	Allele_56	Res_0
H331	Allele_56	Res_3
H333	Allele_56	Res_0
H336	Allele_56	Res_1
H339	Allele_105	Res_2
H341	Allele_56	Res_1
H342	Allele_105	Res_3
H343	Allele_56	Res_2
H344	Allele_105	Res_3
H345	Allele_56	Res_4
H346	Allele_56	Res_2
H348	Allele_56	Res_2
H349	Allele_105	Res_2
H352	Allele_56	Res_2
H353	Allele_56	Res_3
H359	Allele_56	Res_1
H361	Allele_56	Res_1
H362	Allele_105	Res_3
H363	Allele_56	Res_1
H364	Allele_56	Res_5
H366	Allele_105	Res_1
H369	Allele_56	Res_1
H370	Allele_56	Res_3
H374	Allele_56	Res_1
H379	Allele_56	Res_2
H384	Allele_56	Res_1
H385	Allele_105	Res_5	1
H386	Allele_56	Res_1
H388	Allele_56	Res_1
H392	Allele_105	Res_2
H398	Allele_56	Res_4
H401	Allele_56	Res_3
H402	Allele_56	Res_3
H405	Allele_56	Res_2
H406	Allele_56	Res_4
H408	Allele_105	Res_3
H410	Allele_56	Res_2
H411	Allele_56	Res_4
H412	Allele_105	Res_0
H414	Allele_105	Res_3
H416	Allele_105	Res_2
H418	Allele_105	Res_3
H419	Allele_105	Res_4	1
H420	Allele_105	Res_4	1
H421	Allele_56	Res_4
H422	Allele_105	Res_0
H423	Allele_105	Res_0
H424	Allele_105	Res_4	1
H428	Allele_105	Res_2
H429	Allele_105	Res_2
H430	Allele_56	Res_4
H433	Allele_56	Res_4
H434	Allele_105	Res_5	1
H435	Allele_56	Res_3
H438	Allele_56	Res_2
H440	Allele_105	Res_2
H441	Allele_105	Res_1
H446	Allele_56	Res_1
H447	Allele_56	Res_1
H449	Allele_56	Res_5
H450	Allele_56	Res_2
H451	Allele_56	Res_1
H452	Allele_105	Res_2
H455	Allele_105	Res_2
H462	Allele_56	Res_3
H463	Allele_56	Res_4
H464	Allele_56	Res_5
H466	Allele_105	Res_4	1
H467	Allele_56	Res_5
H475	Allele_105	Res_5	1
H477	Allele_56	Res_2
H478	Allele_56	Res_5
H482	Allele_56	Res_1
H484	Allele_105	Res_2
H485	Allele_105	Res_0
H486	Allele_105	Res_0
H489	Allele_105	Res_5	1
H491	Allele_105	Res_1
H492	Allele_56	Res_2
H493	Allele_105	Res_0
H494	Allele_105	Res_1
H498	Allele_105	Res_2
H504	Allele_56	Res_0
H506	Allele_56	Res_0
H507	Allele_56	Res_2
H509	Allele_105	Res_0
H511	Allele_56	Res_1
H514	Allele_105	Res_3
H516	Allele_105	Res_2
H517	Allele_56	Res_3
H520	Allele_105	Res_1
H521	Allele_56	Res_3
H526	Allele_105	Res_1
H527	Allele_105	Res_0
H529	Allele_105	Res_2
H530	Allele_56	Res_4
